# Supplementary material for: Costimulation of γδTCR and TLR7/8 promotes Vδ2 T-cell antitumor activity by modulating mTOR pathway and APC function
Source: HighWire-hosted journal article supplement (doi:10.1136/jitc-2021-003339), 2021-12-01
Supplement: jitc-2021-003339supp001_data_supplement.xlsx [file jitc-2021-003339supp001_data_supplement.xlsx]

## Sheet: Sheet1
Antibodies	Source	Identifier
FITC anti-human CD314 (NKG2D) (1D11)	BioLegend (CA, USA)	#320820
FITC anti-human TCR γ/δ (B1)	BioLegend (CA, USA)	#331208
APC anti-human TCR γ/δ (B1)	BioLegend (CA, USA)	#331212
PerCP/Cyanine(Cy)5.5 anti-human TCR Vδ2 (B6)	BioLegend (CA, USA)	#331424
Brilliant Violet (BV) 421 anti-human TCR Vδ2 (B6)	BioLegend (CA, USA)	#331428
APC/Cy7 anti-human CD8 (SK1)	BioLegend (CA, USA)	#344714
BV 605 anti-human CD3 (OKT3)	BioLegend (CA, USA)	#317322
PE/Dazzlei 594 anti-human CD152 (CTLA-4) (BNI3)	BioLegend (CA, USA)	#369616
PE anti-human CD86 (IT2.2)	BioLegend (CA, USA)	#305406
FITC anti-human CD80 (2D10)	BioLegend (CA, USA)	#305206
APC anti-human CD279 (PD-1) (EH12.2H7)	BioLegend (CA, USA)	#329908
BV 421 anti-human CD178 (Fas-L) (NOK-1)	BioLegend (CA, USA)	#306412
PE/Cy7 anti-human CD107a (LAMP-1) (H4A3)	BioLegend (CA, USA)	#328618
PE/Cy7 anti-mouse/rat/human CD27 (LG.3A10)	BioLegend (CA, USA)	#124216
PE anti-human/mouse Granzyme B Recombinant Antibody (QA16A02)	BioLegend (CA, USA)	#372208
Anti-human CD274 (B70H1, PD-L1) (29E.2A3)	BioLegend (CA, USA)	#329706
FITC anti-human CD25 Antibody	BioLegend (CA, USA)	#302604
FITC Annexin V Apoptosis Detection Kit with 7-AAD	BioLegend (CA, USA)	#640922
Human TLR7 Alexa Fluor® 488-conjugated Antibody	R&D Systems, Inc.(MN, USA)	IC5875G
Human TLR8 Alexa Fluor® 647-conjugated Antibody	R&D Systems, Inc.(MN, USA)	IC8999R-025
PE Mouse Anti-Human CD152 (CTLA-4) (BNI3)	BD Biosciences (NJ, USA)	#555853
PE-Cy7 Mouse anti-Human CD279 (PD-1) (EH12.1)	BD Biosciences (NJ, USA)	#561272
PerCP-Cy5.5 Mouse Anti-Human TCR γ/δ (B1)	BD Biosciences (NJ, USA)	#564157
