# Supplementary material for: Costimulation of γδTCR and TLR7/8 promotes Vδ2 T-cell antitumor activity by modulating mTOR pathway and APC function
Source: HighWire-hosted journal article supplement (doi:10.1136/jitc-2021-003339), 2021-12-01
Supplement: jitc-2021-003339supp014_data_supplement.xlsx [file jitc-2021-003339supp014_data_supplement.xlsx]

## Sheet: Naive vs TEMRA_vd2
Gene	p_val	avg_logFC	pct.1	pct.2	p_val_adj
GZMB	6.15008e-90	-2.24162	0.019	0.943	1.00216e-85
FCGR3A	2.38686e-88	-2.06769	0.027	0.935	3.88939e-84
GZMH	4.16478e-87	-2.40904	0.065	0.947	6.78651e-83
NKG7	1.33697e-86	-1.87207	0.798	1	2.17859e-82
FGFBP2	5.66011e-84	-2.54171	0.069	0.935	9.22314e-80
LTB	4.4561e-82	2.25348	0.954	0.175	7.26121e-78
CST7	1.20229e-78	-1.41441	0.66	1	1.95913e-74
GNLY	3.29279e-64	-2.44235	0.344	0.916	5.36559e-60
IL7R	1.92821e-62	1.71377	0.874	0.198	3.14203e-58
GZMA	5.65152e-62	-1.17847	0.634	1	9.20915e-58
RPL13	3.62526e-61	0.479056	1	1	5.90736e-57
B2M	5.91433e-60	-0.412336	1	1	9.6374e-56
CCL4	6.69055e-57	-1.70305	0.122	0.791	1.09022e-52
PRF1	1.68944e-54	-1.50713	0.29	0.871	2.75294e-50
RPL32	2.64453e-52	0.460031	0.992	1	4.30925e-48
KLRF1	6.14239e-50	-1.47247	0.004	0.616	1.0009e-45
HLA-C	6.12436e-49	-0.472343	1	1	9.97964e-45
RPL39	2.03202e-48	0.412599	0.992	1	3.31118e-44
RPS29	1.48039e-45	0.391831	0.992	0.996	2.41229e-41
RPL34	3.16675e-45	0.367581	0.996	1	5.16023e-41
TRGC1	5.11853e-45	-1.038	0.683	0.962	8.34064e-41
RPLP2	5.85135e-44	0.33967	1	1	9.53477e-40
FOS	4.11202e-43	1.1357	0.969	0.692	6.70054e-39
RPS27	7.94348e-43	0.307274	1	1	1.29439e-38
GZMK	1.90937e-42	1.4134	0.775	0.194	3.11133e-38
RPL13A	3.64188e-39	0.312562	1	1	5.93444e-35
RPS2	4.85583e-39	0.358167	0.996	1	7.91257e-35
HLA-A	5.04289e-39	-0.442226	1	1	8.21738e-35
HLA-B	1.12209e-38	-0.409768	1	1	1.82844e-34
ADGRG1	1.34825e-38	-1.10385	0.027	0.54	2.19697e-34
PFN1	2.14026e-38	-0.603005	0.966	1	3.48756e-34
TYROBP	3.17595e-38	-1.20678	0.198	0.738	5.17521e-34
RPS12	3.22063e-38	0.360763	0.996	1	5.24802e-34
RPL36	3.25698e-38	0.408524	0.992	1	5.30725e-34
RPS18	7.3469e-38	0.367972	1	1	1.19718e-33
TMSB4X	2.82231e-37	-0.363844	0.996	1	4.59895e-33
RPS8	3.70824e-37	0.40879	0.989	0.996	6.04258e-33
EFHD2	5.64661e-37	-0.987865	0.237	0.734	9.20115e-33
SH3BGRL3	1.57548e-36	-0.621323	0.935	0.996	2.56725e-32
RPL11	1.87654e-36	0.339024	0.989	1	3.05782e-32
RPL18A	3.88772e-36	0.410609	0.989	1	6.33505e-32
RPL9	4.1656e-36	0.350328	0.989	1	6.78785e-32
RPL21	6.11913e-36	0.303958	0.992	1	9.97112e-32
RPS28	8.47557e-36	0.334913	0.989	1	1.38109e-31
ACTB	9.75873e-36	-0.740329	0.989	1	1.59019e-31
RPS13	1.26546e-35	0.429076	0.985	0.996	2.06206e-31
JUNB	3.35841e-35	0.922614	0.981	0.935	5.47253e-31
HOPX	1.40243e-34	-0.867689	0.485	0.871	2.28526e-30
CCL5	1.41853e-34	-0.60126	0.912	1	2.31149e-30
RPLP1	6.05908e-34	0.436891	0.989	1	9.87327e-30
CD99	9.76681e-34	-0.738438	0.679	0.935	1.5915e-29
RPL19	1.7042e-33	0.315938	0.992	1	2.777e-29
ARPC2	7.85157e-33	-0.694029	0.828	0.947	1.27941e-28
ITGB2	4.68889e-32	-0.732573	0.66	0.913	7.64054e-28
RPL8	5.39889e-32	0.432013	0.992	1	8.7975e-28
RPL12	6.10401e-32	0.395213	0.992	1	9.94648e-28
SPON2	1.05961e-31	-1.14767	0.122	0.574	1.72663e-27
EEF1A1	1.33384e-31	0.258242	1	1	2.17349e-27
RPS25	4.64759e-31	0.342574	0.981	0.996	7.57325e-27
RPS6	7.45732e-31	0.308617	0.989	0.996	1.21517e-26
PABPC1	2.76692e-30	0.595854	0.973	0.89	4.5087e-26
RPS9	3.62279e-30	0.362648	0.989	0.992	5.90334e-26
RPS21	7.12597e-30	0.351024	0.989	1	1.16118e-25
RPL10	7.51138e-30	0.26585	1	1	1.22398e-25
RPL10A	1.09591e-29	0.374723	0.981	1	1.78578e-25
CD247	2.3002e-29	-0.709476	0.687	0.939	3.74817e-25
MYL12A	2.95456e-29	-0.542548	0.943	0.996	4.81446e-25
RPL22	3.43665e-29	0.434189	0.977	0.989	5.60003e-25
RPL30	8.24664e-29	0.294769	0.989	1	1.34379e-24
CFL1	9.5906e-29	-0.460459	0.966	0.989	1.56279e-24
RPS16	1.28264e-28	0.301587	0.992	1	2.09006e-24
COTL1	3.2551e-28	0.898174	0.58	0.114	5.30418e-24
RAP1B	3.12199e-27	-0.694911	0.622	0.882	5.08728e-23
PRSS23	4.36932e-27	-0.898263	0.015	0.395	7.11981e-23
CD3D	1.87501e-26	-0.605442	0.855	0.966	3.05533e-22
HLA-E	2.28566e-26	-0.40043	0.973	0.992	3.72448e-22
RPLP0	2.62617e-26	0.458788	0.985	0.992	4.27935e-22
KLRD1	2.16139e-25	-0.68064	0.595	0.905	3.52198e-21
S1PR5	6.53395e-25	-0.721129	0.084	0.475	1.06471e-20
RPL4	9.03268e-25	0.381987	0.977	0.989	1.47188e-20
CYBA	2.2548e-24	-0.49046	0.954	1	3.6742e-20
LGALS1	2.39114e-24	-0.937229	0.122	0.525	3.89636e-20
C12orf75	3.03562e-24	-0.689537	0.439	0.76	4.94655e-20
RPL35A	3.39116e-24	0.272564	0.985	1	5.5259e-20
ZFP36L2	3.56214e-24	0.699858	0.92	0.821	5.8045e-20
CLIC1	9.0282e-24	-0.639044	0.748	0.897	1.47115e-19
RPL5	9.74614e-24	0.302625	0.981	1	1.58813e-19
APOBEC3G	1.05206e-23	-0.704213	0.366	0.688	1.71432e-19
RPL37	5.32781e-23	0.271704	0.985	1	8.68167e-19
TRDC	7.9092e-23	-0.5567	0.844	0.989	1.2888e-18
ACTG1	2.05103e-22	-0.636746	0.931	0.989	3.34215e-18
CTSC	6.2809e-22	-0.723226	0.282	0.624	1.02347e-17
SRGN	9.33049e-22	-0.505889	0.84	0.977	1.5204e-17
RPL18	1.61175e-21	0.294383	0.992	0.992	2.62634e-17
RPSA	1.70358e-21	0.314467	0.992	1	2.77598e-17
RPS23	2.76223e-21	0.275188	0.985	1	4.50105e-17
RPS17	4.40635e-21	0.380806	0.985	0.989	7.18015e-17
CD52	5.57477e-21	-0.431295	0.966	0.996	9.08408e-17
RPL28	2.41143e-20	0.255551	0.992	1	3.92942e-16
RPS5	5.57282e-20	0.37563	0.981	0.992	9.08091e-16
RPS20	8.41392e-20	0.261284	0.989	0.996	1.37105e-15
S100A4	8.77494e-20	-0.43593	0.92	0.996	1.42988e-15
C1orf21	9.94747e-20	-0.673179	0.115	0.471	1.62094e-15
TTC38	1.30892e-19	-0.684129	0.046	0.357	2.13289e-15
RPS19	2.85383e-19	0.255628	0.996	1	4.65032e-15
JUN	2.94784e-19	0.56456	0.943	0.73	4.80351e-15
EEF1B2	3.80155e-19	0.370311	0.977	0.989	6.19462e-15
PLEK	4.20881e-19	-0.5909	0.191	0.544	6.85826e-15
RPL38	5.6581e-19	0.26749	0.992	0.996	9.21987e-15
GPR183	9.61797e-19	0.620005	0.305	0.019	1.56725e-14
GZMM	1.12915e-18	-0.549275	0.653	0.886	1.83995e-14
CCR7	1.16424e-18	0.506789	0.26	0	1.89714e-14
BIN2	2.91051e-18	-0.544935	0.645	0.84	4.74267e-14
ZEB2	4.93854e-18	-0.61904	0.111	0.437	8.04736e-14
RPL17	5.22813e-18	0.400304	0.981	0.981	8.51923e-14
ARPC5L	5.65553e-18	-0.571563	0.321	0.65	9.21568e-14
CD53	9.93567e-18	-0.487998	0.786	0.89	1.61902e-13
FCRL6	1.93136e-17	-0.660337	0.065	0.365	3.14715e-13
RCAN3	2.06016e-17	0.516586	0.271	0.011	3.35704e-13
PLAC8	2.44172e-17	-0.666611	0.626	0.795	3.97878e-13
BTG1	3.17351e-17	0.417129	0.989	0.97	5.17124e-13
PPP1CA	4.16791e-17	-0.510024	0.588	0.783	6.79162e-13
RPL36A	4.54143e-17	0.398909	0.985	0.97	7.40025e-13
CD3G	1.07839e-16	-0.572573	0.542	0.791	1.75724e-12
TMSB10	1.11553e-16	-0.309495	0.981	1	1.81775e-12
NOSIP	1.63726e-16	0.655616	0.756	0.502	2.66792e-12
ABHD17A	1.97351e-16	-0.62566	0.347	0.643	3.21583e-12
DUSP1	3.04737e-16	0.478701	0.985	0.943	4.9657e-12
CAP1	3.07416e-16	-0.53514	0.534	0.764	5.00934e-12
PTGDS	4.2626e-16	-2.30179	0.019	0.262	6.94591e-12
IFITM2	5.80303e-16	-0.507966	0.668	0.837	9.45604e-12
SELL	8.71877e-16	0.557837	0.706	0.342	1.42072e-11
CDC42	4.09959e-15	-0.511506	0.649	0.852	6.68029e-11
FGR	8.38248e-15	-0.56141	0.092	0.369	1.36593e-10
MYL12B	1.00544e-14	-0.406613	0.844	0.928	1.63836e-10
LSP1	1.51584e-14	-0.423076	0.76	0.867	2.47006e-10
TBX21	2.11824e-14	-0.578474	0.099	0.365	3.45168e-10
MT-ND2	3.31239e-14	0.345012	0.996	1	5.39753e-10
C6orf48	3.81135e-14	0.578292	0.687	0.376	6.2106e-10
SELENOT	4.31225e-14	-0.518967	0.324	0.57	7.02682e-10
AQP3	5.55111e-14	0.488303	0.271	0.034	9.04554e-10
NELL2	5.94283e-14	0.401257	0.195	0	9.68384e-10
CTSD	6.16465e-14	-0.611032	0.366	0.597	1.00453e-09
NAP1L1	6.98019e-14	0.428864	0.87	0.677	1.13742e-09
CTSW	7.41296e-14	-0.436005	0.813	0.924	1.20794e-09
SCP2	7.87954e-14	-0.507241	0.324	0.597	1.28397e-09
DUSP2	7.98033e-14	0.621236	0.809	0.567	1.30039e-09
CX3CR1	8.53659e-14	-0.461229	0.004	0.202	1.39104e-09
RAB5IF	9.01706e-14	-0.503177	0.214	0.494	1.46933e-09
ABI3	9.05926e-14	-0.516972	0.099	0.373	1.47621e-09
LITAF	9.70211e-14	-0.448097	0.695	0.856	1.58096e-09
NDUFB7	1.61419e-13	-0.479483	0.393	0.616	2.63033e-09
FLNA	1.64424e-13	-0.538859	0.397	0.646	2.67929e-09
LEF1	2.03999e-13	0.398081	0.187	0	3.32416e-09
FOSB	2.06338e-13	0.613961	0.569	0.247	3.36227e-09
MYL6	2.32205e-13	-0.368476	0.905	0.951	3.78378e-09
IFNG	3.36441e-13	-0.501972	0.023	0.24	5.48231e-09
DOK2	4.30286e-13	-0.548607	0.298	0.548	7.0115e-09
EMP3	4.37775e-13	-0.395156	0.836	0.928	7.13354e-09
CD63	4.86351e-13	-0.486195	0.397	0.643	7.92509e-09
APMAP	5.39691e-13	-0.500511	0.328	0.57	8.79426e-09
UBB	5.5776e-13	-0.320761	0.939	0.966	9.0887e-09
S100A6	6.43584e-13	-0.3504	0.878	0.97	1.04872e-08
SAMD3	8.39108e-13	-0.552623	0.324	0.57	1.36733e-08
GNG2	1.31524e-12	-0.52757	0.256	0.521	2.14318e-08
ITGAM	1.48931e-12	-0.404574	0.027	0.232	2.42684e-08
ANXA6	2.00299e-12	-0.482713	0.473	0.692	3.26387e-08
CYTOR	2.28992e-12	-0.504284	0.137	0.388	3.73143e-08
YWHAQ	3.34951e-12	-0.455179	0.561	0.738	5.45802e-08
CD300A	4.1052e-12	-0.512477	0.195	0.475	6.68943e-08
AKR1C3	4.16143e-12	-0.476085	0.015	0.202	6.78105e-08
TPST2	5.68143e-12	-0.486529	0.252	0.498	9.2579e-08
CARD16	6.00726e-12	-0.471151	0.244	0.506	9.78883e-08
SLC9A3R1	6.22027e-12	-0.501841	0.336	0.563	1.01359e-07
HCST	6.60644e-12	-0.385601	0.866	0.985	1.07652e-07
ERH	7.19497e-12	-0.4491	0.359	0.589	1.17242e-07
ASCL2	8.5373e-12	-0.37001	0.008	0.183	1.39115e-07
CD320	1.0092e-11	-0.525962	0.118	0.354	1.64448e-07
PPP1R18	1.08935e-11	-0.48801	0.374	0.589	1.7751e-07
LCP1	1.29746e-11	-0.444432	0.531	0.715	2.11421e-07
LY6E	1.33604e-11	-0.415606	0.679	0.833	2.17708e-07
BRK1	1.35903e-11	-0.435912	0.519	0.7	2.21455e-07
PDE4B	1.61632e-11	0.38118	0.252	0.042	2.6338e-07
CORO1A	1.73748e-11	-0.377816	0.947	0.954	2.83122e-07
SUN2	1.86199e-11	-0.406922	0.469	0.681	3.03412e-07
BSG	2.30709e-11	-0.444426	0.405	0.62	3.7594e-07
ATP5MPL	2.73655e-11	-0.379151	0.538	0.741	4.4592e-07
ZNF331	2.74391e-11	0.493308	0.359	0.106	4.47121e-07
GNPTAB	2.98735e-11	-0.465232	0.057	0.259	4.86789e-07
MT-ND3	3.17764e-11	0.284994	0.996	0.989	5.17796e-07
IL32	5.43012e-11	-0.322265	0.901	0.973	8.84838e-07
ATP5F1B	6.04374e-11	-0.440476	0.42	0.616	9.84827e-07
MYC	6.88944e-11	0.371804	0.179	0.011	1.12263e-06
MT-ND1	7.31288e-11	0.285765	0.996	0.989	1.19163e-06
MYO1F	8.26931e-11	-0.40076	0.58	0.757	1.34748e-06
UBE2F	8.74116e-11	-0.475405	0.111	0.327	1.42437e-06
SERTAD3	9.14821e-11	-0.493067	0.092	0.304	1.4907e-06
TNFAIP3	1.07641e-10	0.498836	0.779	0.578	1.75401e-06
CCL3	1.09188e-10	-0.879504	0.019	0.194	1.77922e-06
ARHGDIB	1.09934e-10	-0.300589	0.962	0.977	1.79137e-06
TRIR	1.17951e-10	-0.396844	0.615	0.821	1.92201e-06
RHOC	1.18132e-10	-0.424767	0.336	0.567	1.92497e-06
WDR1	1.20496e-10	-0.442508	0.382	0.586	1.96348e-06
ATP5MD	1.21803e-10	-0.410866	0.523	0.715	1.98478e-06
CAMK4	1.44505e-10	0.356093	0.252	0.049	2.35471e-06
DBI	1.46988e-10	-0.381877	0.489	0.684	2.39517e-06
TRAC	1.60196e-10	0.441707	0.771	0.494	2.61039e-06
GAPDH	1.62711e-10	-0.305633	0.931	0.981	2.65138e-06
NCF1	1.84338e-10	0.477996	0.256	0.053	3.00379e-06
CHST12	1.88054e-10	-0.406428	0.282	0.506	3.06434e-06
TCF7	1.90084e-10	0.431107	0.466	0.186	3.09742e-06
MSN	2.17659e-10	-0.472578	0.439	0.624	3.54675e-06
CALM1	2.78053e-10	-0.345878	0.882	0.97	4.53088e-06
PPP2R5C	2.80677e-10	-0.371109	0.649	0.821	4.57363e-06
COPS9	2.82397e-10	-0.405739	0.321	0.559	4.60165e-06
NBEAL1	2.99887e-10	0.394809	0.855	0.681	4.88666e-06
TRBC1	3.26851e-10	-0.448977	0.634	0.814	5.32603e-06
SOCS3	3.52176e-10	0.438563	0.374	0.133	5.73871e-06
SUB1	3.55156e-10	-0.364873	0.767	0.84	5.78726e-06
GLIPR2	3.62643e-10	-0.375803	0.263	0.475	5.90928e-06
RAC2	4.41531e-10	-0.332685	0.844	0.932	7.19474e-06
RAB9A	5.32381e-10	-0.412199	0.122	0.338	8.67514e-06
PAXX	5.76274e-10	-0.408802	0.42	0.605	9.39038e-06
GSTP1	5.84771e-10	-0.405116	0.477	0.692	9.52885e-06
SRP14	5.88635e-10	-0.300315	0.901	0.962	9.5918e-06
PDIA3	6.00789e-10	-0.413483	0.553	0.711	9.78985e-06
SNHG8	6.98191e-10	0.461591	0.721	0.521	1.1377e-05
TBCB	7.38131e-10	-0.439038	0.359	0.548	1.20279e-05
BHLHE40	8.44416e-10	-0.474621	0.26	0.468	1.37598e-05
AK5	8.67417e-10	-0.369799	0.008	0.152	1.41346e-05
MATK	8.91119e-10	-0.389179	0.538	0.684	1.45208e-05
LCK	1.04224e-09	-0.370547	0.698	0.802	1.69833e-05
MRPL54	1.09635e-09	-0.426779	0.279	0.479	1.7865e-05
CD2	1.13009e-09	-0.473436	0.469	0.654	1.84148e-05
ARPC4	1.39113e-09	-0.428041	0.496	0.658	2.26684e-05
CD3E	1.68572e-09	-0.322113	0.847	0.897	2.74688e-05
ARF6	1.73983e-09	-0.344184	0.641	0.768	2.83505e-05
LINC01871	1.91106e-09	-0.468783	0.298	0.51	3.11407e-05
SPN	2.57217e-09	-0.451641	0.229	0.445	4.19135e-05
KLRG1	2.76147e-09	-0.422004	0.496	0.681	4.49982e-05
MYO1G	2.79653e-09	-0.418047	0.302	0.51	4.55694e-05
CD27	3.33902e-09	0.440958	0.538	0.266	5.44094e-05
CAPZB	3.36953e-09	-0.338601	0.664	0.76	5.49065e-05
ZNF683	3.50386e-09	-0.545479	0.103	0.312	5.70953e-05
RASSF1	3.50784e-09	-0.44447	0.328	0.529	5.71603e-05
SPINT2	3.6135e-09	0.263896	0.145	0.008	5.8882e-05
AES	3.83061e-09	-0.311987	0.832	0.894	6.24199e-05
ARPC3	4.38714e-09	-0.284872	0.855	0.932	7.14884e-05
TGFB1	4.78235e-09	-0.451238	0.504	0.692	7.79284e-05
LINC00623	5.11631e-09	-0.399543	0.34	0.536	8.33703e-05
SYNGR1	5.9771e-09	-0.442223	0.084	0.266	9.73968e-05
EIF3E	6.20704e-09	0.366769	0.905	0.768	0.000101144
A1BG	6.21009e-09	0.307336	0.191	0.03	0.000101193
CD8A	6.90367e-09	-0.395816	0.023	0.171	0.000112495
NDUFA12	7.05311e-09	-0.437368	0.294	0.483	0.00011493
DPP4	8.79963e-09	0.282366	0.172	0.023	0.00014339
UCP2	8.8007e-09	-0.407358	0.573	0.7	0.000143407
TMEM273	8.98964e-09	-0.310224	0.004	0.129	0.000146486
PYHIN1	9.19059e-09	-0.516615	0.214	0.399	0.000149761
HSP90AB1	9.39983e-09	0.414981	0.836	0.654	0.00015317
CAPG	9.41069e-09	0.283427	0.118	0	0.000153347
FAM49B	1.11881e-08	-0.379487	0.439	0.631	0.00018231
COX6A1	1.13295e-08	-0.360797	0.603	0.726	0.000184614
NPM1	1.18101e-08	0.267278	0.95	0.962	0.000192445
AC090498.1	1.19218e-08	0.847227	0.183	0.03	0.000194266
ATP5PB	1.28759e-08	-0.410672	0.328	0.517	0.000209812
DSTN	1.32919e-08	-0.413172	0.412	0.578	0.000216592
SELENOW	1.34106e-08	-0.394134	0.29	0.471	0.000218525
PTGDR	1.51032e-08	-0.39218	0.065	0.236	0.000246106
TMEM123	1.55884e-08	0.364681	0.672	0.384	0.000254013
CLIC3	1.59637e-08	-0.511399	0.149	0.35	0.000260128
KLRC1	1.70754e-08	-0.460951	0.447	0.665	0.000278244
EID1	1.92628e-08	-0.361387	0.462	0.627	0.000313888
CD28	2.04352e-08	0.3008	0.141	0.011	0.000332992
CD79A	2.2414e-08	1.03923	0.122	0.004	0.000365236
SERF2	2.38176e-08	-0.256399	0.962	0.989	0.000388108
OSTF1	2.62011e-08	-0.453457	0.363	0.521	0.000426946
POMP	2.66326e-08	-0.393202	0.34	0.544	0.000433978
DHRS7	2.82344e-08	-0.364594	0.466	0.631	0.00046008
AREG	2.90692e-08	0.327854	0.164	0.023	0.000473683
ITM2C	3.01541e-08	0.268663	0.149	0.015	0.000491361
MIR4435-2HG	3.74068e-08	-0.360636	0.057	0.221	0.000609544
ATP5IF1	3.74161e-08	-0.292907	0.469	0.665	0.000609696
AC004865.2	3.77036e-08	-0.30879	0.061	0.228	0.00061438
IL2RB	3.99971e-08	-0.377129	0.221	0.426	0.000651752
RAB5C	4.25665e-08	-0.402333	0.324	0.483	0.000693621
SPCS2	4.80233e-08	-0.309923	0.435	0.605	0.000782539
ZFAS1	5.33953e-08	0.39118	0.802	0.624	0.000870077
RHOA	5.51873e-08	-0.309051	0.683	0.779	0.000899277
ARPC5	5.96692e-08	-0.364055	0.496	0.627	0.000972309
EEF1G	6.35417e-08	0.357876	0.359	0.148	0.00103541
ATP5MC3	6.66817e-08	-0.335684	0.489	0.631	0.00108658
SUMO2	6.67424e-08	-0.255366	0.817	0.89	0.00108757
ARL6IP5	6.78258e-08	-0.329801	0.55	0.673	0.00110522
GLTSCR2	7.44264e-08	0.800814	0.183	0.038	0.00121278
MIAT	7.60681e-08	-0.376642	0.107	0.289	0.00123953
RARRES3	7.8658e-08	-0.337582	0.683	0.814	0.00128173
CNN2	8.01045e-08	0.329799	0.569	0.308	0.0013053
GNB2L1	8.31968e-08	1.0397	0.183	0.038	0.00135569
GUK1	8.85014e-08	-0.292967	0.653	0.795	0.00144213
LEPROTL1	8.97012e-08	0.366222	0.679	0.445	0.00146168
C9orf16	9.03345e-08	-0.292829	0.523	0.643	0.001472
GLRX	9.38941e-08	-0.342262	0.477	0.639	0.00153
PLIN2	9.52211e-08	-0.43754	0.107	0.278	0.00155163
HINT1	9.97854e-08	0.261098	0.927	0.859	0.001626
ARL6IP1	1.19352e-07	-0.391024	0.321	0.487	0.00194484
JAML	1.27985e-07	0.279255	0.221	0.057	0.00208551
F2R	1.28762e-07	-0.352035	0.053	0.205	0.00209817
INPP4B	1.32036e-07	0.250851	0.13	0.011	0.00215153
PLP2	1.3766e-07	0.353185	0.462	0.228	0.00224317
MAP1LC3B	1.67963e-07	-0.381217	0.374	0.532	0.00273696
PSMB9	1.81302e-07	-0.287431	0.634	0.753	0.00295432
TGFBR3	1.87352e-07	-0.31554	0.076	0.24	0.0030529
LAT	1.90641e-07	-0.358228	0.508	0.631	0.00310649
AOAH	1.9158e-07	-0.373717	0.118	0.289	0.0031218
HPGD	1.97663e-07	-0.328012	0.053	0.198	0.00322091
ELOB	2.00212e-07	-0.28961	0.626	0.726	0.00326245
ATP5ME	2.07384e-07	-0.328472	0.519	0.677	0.00337931
PXN	2.11808e-07	-0.385737	0.149	0.316	0.00345141
TRAF3IP3	2.1433e-07	-0.287079	0.519	0.669	0.00349251
MS4A1	2.34284e-07	0.565782	0.107	0.004	0.00381765
ATP5L	2.35838e-07	0.588591	0.172	0.034	0.00384297
PTMS	2.43919e-07	-0.324544	0.076	0.236	0.00397467
FEZ1	2.46657e-07	-0.320227	0.042	0.179	0.00401927
CD74	2.50778e-07	1.34093	0.84	0.673	0.00408643
ENSA	2.51637e-07	-0.339887	0.431	0.586	0.00410042
CLEC2B	2.65689e-07	-0.282848	0.504	0.643	0.0043294
PARK7	2.86766e-07	-0.320369	0.534	0.669	0.00467285
TMEM258	2.87641e-07	-0.282046	0.611	0.738	0.0046871
PTPN18	3.19941e-07	-0.379818	0.13	0.297	0.00521344
CES1	3.29156e-07	-0.300085	0.015	0.133	0.00536359
YBX3	3.7461e-07	0.354198	0.225	0.068	0.00610427
LDHB	3.76712e-07	0.359013	0.809	0.715	0.00613853
CASP1	4.41574e-07	-0.361806	0.26	0.445	0.00719545
XBP1	5.23578e-07	-0.318646	0.466	0.616	0.00853171
TBC1D10C	5.44274e-07	-0.33149	0.534	0.65	0.00886894
PGAM1	5.60425e-07	-0.316029	0.374	0.529	0.00913212
CD164	5.71969e-07	-0.342363	0.37	0.544	0.00932024
ITGB1	6.35626e-07	-0.372794	0.179	0.354	0.0103575
PPDPF	6.53404e-07	-0.280082	0.813	0.856	0.0106472
RNF166	6.6957e-07	-0.340068	0.374	0.551	0.0109106
CASP4	6.91606e-07	-0.328256	0.42	0.567	0.0112697
LDLRAP1	7.13978e-07	0.276375	0.26	0.087	0.0116343
ACTR3	8.45462e-07	-0.364838	0.427	0.57	0.0137768
ATP5PF	8.78374e-07	-0.321362	0.393	0.532	0.0143131
RAN	9.31309e-07	-0.259247	0.561	0.665	0.0151757
GIMAP7	9.37535e-07	-0.353632	0.408	0.574	0.0152771
C14orf2	9.38637e-07	0.367412	0.141	0.023	0.0152951
RNF130	9.51726e-07	-0.302742	0.073	0.217	0.0155084
CTDSP1	9.53639e-07	-0.356388	0.202	0.361	0.0155395
PLEKHF1	1.01171e-06	-0.311753	0.084	0.232	0.0164858
MAPK1	1.03456e-06	-0.35082	0.218	0.395	0.0168582
TMEM173	1.15958e-06	-0.358341	0.191	0.35	0.0188954
ATP5O	1.20114e-06	0.258456	0.107	0.008	0.0195726
ATP5E	1.2083e-06	0.599932	0.168	0.038	0.0196892
FAM173A	1.22653e-06	0.303142	0.389	0.175	0.0199864
JMJD6	1.36598e-06	-0.294663	0.084	0.228	0.0222587
SLBP	1.40795e-06	-0.26443	0.099	0.251	0.0229426
ACTN4	1.43917e-06	-0.319999	0.153	0.319	0.0234513
ZAP70	1.44039e-06	-0.336983	0.321	0.471	0.0234711
EML4	1.46855e-06	0.37972	0.427	0.224	0.0239301
PSMB10	1.55098e-06	-0.343221	0.378	0.529	0.0252732
ATP5G2	1.5867e-06	0.388247	0.16	0.034	0.0258553
FBXO2	1.63377e-06	-0.281038	0.008	0.103	0.0266223
ITGB7	1.73287e-06	-0.335659	0.294	0.452	0.0282371
TSPYL2	1.77138e-06	0.37153	0.324	0.144	0.0288646
SERTAD1	1.91442e-06	-0.337502	0.202	0.365	0.0311955
GOLGA7	2.16571e-06	-0.329993	0.252	0.395	0.0352903
RNF167	2.16953e-06	-0.381711	0.317	0.468	0.0353524
IL2RG	2.20995e-06	-0.257401	0.615	0.749	0.0360112
2020-09-15	2.35703e-06	0.271856	0.111	0.011	0.0384078
CALR	2.67752e-06	-0.39073	0.603	0.696	0.0436302
SLC44A2	2.76547e-06	-0.324219	0.145	0.297	0.0450633
PTGER2	3.02827e-06	-0.281037	0.221	0.399	0.0493456
MED10	3.15542e-06	-0.317366	0.416	0.544	0.0514175
PSMB1	3.32238e-06	-0.2936	0.58	0.654	0.0541381
CYB5B	3.65746e-06	-0.271815	0.153	0.304	0.0595983
PTPN4	4.03158e-06	-0.31036	0.26	0.418	0.0656946
PIGT	4.18382e-06	-0.292595	0.13	0.285	0.0681753
UPP1	4.42117e-06	-0.326907	0.198	0.361	0.0720429
GTF3C1	4.78984e-06	-0.303978	0.13	0.281	0.0780505
C19orf43	5.1755e-06	0.320773	0.13	0.023	0.0843348
STMN1	5.24461e-06	-0.336325	0.099	0.24	0.085461
POLR2G	5.41357e-06	-0.343846	0.282	0.445	0.0882142
ARHGAP15	5.42107e-06	0.357165	0.519	0.312	0.0883363
FKBP8	5.4972e-06	-0.250391	0.45	0.597	0.0895768
NDUFB10	5.72234e-06	-0.275647	0.37	0.513	0.0932456
G6PD	6.34609e-06	-0.316347	0.122	0.266	0.103409
AL121944.1	6.41956e-06	0.30328	0.218	0.072	0.104607
USMG5	6.58882e-06	0.355024	0.134	0.027	0.107365
SH3BP5	6.74457e-06	-0.333815	0.237	0.376	0.109903
LMNA	7.19732e-06	0.377597	0.179	0.053	0.11728
RHOG	7.29238e-06	-0.258901	0.443	0.563	0.118829
VDAC3	7.54705e-06	-0.300306	0.198	0.35	0.122979
ATP6V1F	7.66573e-06	-0.264549	0.374	0.521	0.124913
AC004687.1	7.77493e-06	-0.32007	0.073	0.198	0.126693
NARF	7.93333e-06	-0.281305	0.092	0.228	0.129274
CTBP2	7.97598e-06	-0.260284	0.027	0.129	0.129969
P4HB	8.2711e-06	-0.296633	0.466	0.582	0.134778
ANXA4	8.34225e-06	-0.275327	0.076	0.209	0.135937
ATP5F1A	8.52187e-06	-0.275811	0.458	0.612	0.138864
TMEM50A	8.55801e-06	-0.257274	0.424	0.551	0.139453
TSEN54	9.32773e-06	-0.31156	0.221	0.373	0.151995
RGCC	9.72565e-06	0.402238	0.393	0.209	0.158479
ITGAL	9.72851e-06	-0.306761	0.187	0.342	0.158526
VIM	1.13631e-05	0.297447	0.874	0.776	0.185162
UFD1	1.15446e-05	-0.297084	0.134	0.278	0.18812
PTPN6	1.16293e-05	-0.39164	0.237	0.38	0.1895
SATB1	1.17678e-05	0.278623	0.382	0.194	0.191757
CHMP4B	1.17678e-05	-0.302019	0.202	0.342	0.191757
DYNLL1	1.2365e-05	-0.352216	0.321	0.468	0.201488
KCNAB2	1.337e-05	-0.286266	0.187	0.331	0.217865
CD160	1.36084e-05	-0.31958	0.057	0.179	0.221748
ZFAND6	1.38567e-05	-0.323019	0.187	0.323	0.225794
IKBKG	1.41613e-05	-0.261187	0.065	0.186	0.230758
SH3BGRL	1.58059e-05	-0.275446	0.492	0.608	0.257558
TRAT1	1.63061e-05	0.275179	0.302	0.137	0.265707
CCND3	1.6717e-05	-0.255238	0.71	0.791	0.272403
LPCAT1	1.72867e-05	-0.297154	0.076	0.198	0.281687
NR4A2	1.73047e-05	0.397282	0.538	0.354	0.28198
MCRIP1	1.73544e-05	-0.328468	0.183	0.316	0.28279
PSMB8	1.85343e-05	-0.271382	0.481	0.624	0.302017
MIEN1	1.93607e-05	-0.251942	0.21	0.357	0.315482
PSMA1	2.04209e-05	-0.252549	0.431	0.559	0.332759
ORAI1	2.05301e-05	-0.281808	0.172	0.316	0.334538
CAPNS1	2.09367e-05	-0.270109	0.206	0.346	0.341164
RUNX3	2.12545e-05	-0.318764	0.309	0.449	0.346341
PPP4C	2.1752e-05	-0.293788	0.263	0.407	0.354448
FLT3LG	2.28413e-05	0.330585	0.42	0.224	0.372199
PLA2G16	2.34528e-05	-0.309494	0.141	0.27	0.382163
HLA-DQB1	2.35893e-05	0.709195	0.164	0.053	0.384388
ALOX5AP	2.36889e-05	-0.30167	0.435	0.578	0.386011
SERP1	2.41754e-05	0.277458	0.771	0.582	0.393938
TRGC2	2.41911e-05	-0.546131	0.637	0.711	0.394195
TXNIP	2.46122e-05	-0.273042	0.893	0.928	0.401057
SDF2	2.73243e-05	-0.272955	0.099	0.221	0.445249
CELF2	2.81132e-05	-0.284033	0.412	0.54	0.458104
CDC25B	2.81616e-05	-0.330442	0.279	0.407	0.458893
ADGRE5	2.85182e-05	-0.280279	0.382	0.513	0.464705
RBM22	2.92181e-05	-0.27054	0.111	0.24	0.476108
GHITM	3.00293e-05	-0.27518	0.454	0.54	0.489327
SMDT1	3.09877e-05	0.280249	0.698	0.521	0.504945
SERPINB1	3.25337e-05	-0.295675	0.263	0.403	0.530137
PMAIP1	3.30197e-05	-0.299187	0.317	0.468	0.538057
TCEB2	3.54572e-05	0.266437	0.122	0.027	0.577776
STK10	3.63958e-05	-0.262711	0.24	0.369	0.593069
PSMD8	3.66649e-05	-0.294304	0.382	0.494	0.597454
COMT	3.72264e-05	-0.255345	0.122	0.251	0.606605
DNAJC1	3.83165e-05	-0.301774	0.179	0.312	0.624367
CD44	3.88322e-05	0.305773	0.79	0.639	0.632771
STX8	4.25422e-05	-0.266532	0.149	0.278	0.693225
RABAC1	4.68396e-05	-0.262009	0.427	0.536	0.763251
GNG5	4.70327e-05	-0.309241	0.424	0.517	0.766398
AC020916.1	4.72075e-05	-0.279117	0.137	0.266	0.769247
HNRNPF	4.7405e-05	-0.252453	0.473	0.582	0.772465
CD2BP2	5.10114e-05	-0.254126	0.111	0.24	0.83123
SDHC	5.20371e-05	-0.260491	0.279	0.403	0.847945
PPA1	5.23914e-05	0.301972	0.477	0.289	0.853718
DTNBP1	5.4031e-05	-0.27872	0.13	0.255	0.880435
RPS4Y1	5.44987e-05	0.438903	0.126	0.03	0.888056
HMGN2	5.68526e-05	-0.265599	0.634	0.703	0.926413
FMNL1	5.70194e-05	-0.266729	0.382	0.498	0.929131
RHOF	5.94092e-05	-0.314204	0.359	0.471	0.968072
SNRPD3	5.94712e-05	-0.264428	0.218	0.342	0.969083
TMEM9B	6.24435e-05	-0.295584	0.237	0.365	1
TNFRSF14	6.43295e-05	-0.27326	0.309	0.456	1
CEP78	6.87226e-05	-0.262179	0.042	0.137	1
SCAMP2	6.89504e-05	-0.250772	0.168	0.293	1
SSBP4	8.58762e-05	-0.303634	0.298	0.422	1
ANXA2	8.81187e-05	-0.282138	0.279	0.414	1
CD83	9.08997e-05	0.290492	0.107	0.023	1
SUPT4H1	9.12624e-05	-0.294308	0.271	0.392	1
CCDC88C	0.000100717	-0.285604	0.24	0.361	1
ASNA1	0.000100796	-0.306001	0.202	0.323	1
TFDP2	0.000101582	-0.280024	0.073	0.179	1
DDX6	0.000106485	-0.265034	0.313	0.418	1
CCDC69	0.000107443	-0.262448	0.221	0.342	1
HLA-DQA1	0.000109055	0.761575	0.103	0.023	1
PATL2	0.000109759	-0.283984	0.095	0.209	1
FBXW2	0.000114269	-0.261373	0.088	0.198	1
APOBEC3C	0.00011639	-0.404706	0.263	0.384	1
LST1	0.000117025	0.361944	0.137	0.042	1
FRG1	0.000118269	-0.272387	0.225	0.35	1
PTPN7	0.000118385	-0.30054	0.279	0.411	1
SUMO1	0.000119425	-0.285188	0.435	0.529	1
CDK2AP2	0.000122702	-0.286966	0.168	0.293	1
CDC42EP3	0.000125061	-0.290232	0.191	0.312	1
UBE2A	0.000130949	-0.257469	0.134	0.247	1
PIK3R1	0.000140546	0.326111	0.508	0.35	1
LAMP1	0.000149444	-0.258374	0.389	0.483	1
JPT1	0.000150718	-0.250854	0.134	0.251	1
SLC2A3	0.000154036	0.332445	0.435	0.266	1
ATP5I	0.000179385	0.25408	0.103	0.023	1
CAPN1	0.000181556	-0.280922	0.183	0.293	1
NOP10	0.000183876	-0.270436	0.275	0.403	1
ITGB1BP1	0.000187997	-0.277157	0.237	0.365	1
GATA3	0.00019179	0.255665	0.332	0.183	1
ATP5D	0.000197003	0.298346	0.115	0.03	1
CAPN2	0.000203179	-0.250914	0.355	0.479	1
CASP8	0.000228921	-0.260914	0.16	0.289	1
RBX1	0.00026863	-0.290642	0.332	0.437	1
SNHG7	0.000290008	0.270705	0.336	0.183	1
SLAMF7	0.000301905	-0.276055	0.126	0.232	1
NDUFC2	0.000308561	-0.261136	0.332	0.452	1
CD6	0.000311942	-0.27255	0.309	0.414	1
SIRT2	0.000313104	-0.272705	0.164	0.274	1
HLA-DMB	0.000318753	0.330026	0.134	0.046	1
DERL1	0.00032147	-0.303256	0.218	0.327	1
AGTRAP	0.000356144	-0.271374	0.126	0.232	1
GNAI2	0.000358922	-0.276542	0.378	0.468	1
BLOC1S1	0.000360947	-0.250841	0.26	0.369	1
PNN	0.000386962	-0.253211	0.385	0.471	1
ZMAT2	0.000401774	-0.281081	0.206	0.316	1
CYC1	0.000430471	-0.254286	0.225	0.331	1
CFLAR	0.000459885	-0.265851	0.412	0.506	1
ACTR1A	0.000476516	-0.270397	0.092	0.19	1
SELPLG	0.000479142	-0.259886	0.195	0.3	1
PDCD4	0.0004847	0.317665	0.477	0.319	1
ETHE1	0.000488125	-0.266629	0.16	0.266	1
CISD3	0.000492567	-0.280805	0.179	0.285	1
COPE	0.0005244	-0.271504	0.5	0.551	1
KLF2	0.000550165	0.294033	0.515	0.361	1
PSMB6	0.000552708	-0.25719	0.351	0.433	1
CREBRF	0.000675133	-0.256003	0.176	0.278	1
HLA-DMA	0.000884596	0.431077	0.156	0.068	1
CBX6	0.000913202	-0.254316	0.153	0.259	1
IFRD1	0.000920985	0.323556	0.397	0.255	1
NCKAP1L	0.000962047	-0.257597	0.111	0.205	1
ATP1B3	0.000984866	-0.266663	0.229	0.327	1
IFI27L2	0.00125753	-0.253009	0.214	0.304	1
AKR1B1	0.00132627	-0.273413	0.244	0.331	1
NFKBIA	0.00143099	-0.312528	0.851	0.882	1
PLD3	0.00143243	-0.25217	0.134	0.228	1
ARHGAP9	0.00166438	-0.26273	0.221	0.316	1
SH3GLB1	0.0016998	-0.255338	0.176	0.266	1
TWF2	0.00177364	-0.252416	0.206	0.297	1
RNF115	0.00179218	-0.251085	0.126	0.217	1
CCDC107	0.00209285	-0.251498	0.309	0.399	1
C1orf56	0.00219349	-0.375257	0.191	0.293	1
S100B	0.00269814	-0.888242	0.115	0.194	1
ATP6V1E1	0.00298828	-0.259726	0.172	0.251	1
DDX3X	0.00361756	0.284862	0.458	0.304	1
PSMA4	0.00482741	-0.250033	0.328	0.395	1
BAX	0.0050231	-0.272259	0.393	0.441	1
RAB11A	0.00514191	-0.258267	0.198	0.278	1
HLA-DRA	0.00633912	1.87961	0.118	0.057	1
COL6A2	0.00677699	-0.255856	0.176	0.255	1
PHF11	0.00833959	-0.267503	0.168	0.24	1
XCL2	0.0083857	-0.299199	0.191	0.266	1
HLA-DRB5	0.016134	0.541559	0.115	0.061	1

## Sheet: DAVID_Fun_UP_Keywords
	Category	Term	RT	Genes	Count	LT	PH	PT	%	P-Value	Fold Enrichment	Bonferroni	Benjamini	FDR	Fisher Exact
1	UP_KEYWORDS	Ribosomal protein	RT		50	516	185	20581	9.6	2.7e-36	10.8	9e-34	9e-34	3.6e-33	1.9e-37
2	UP_KEYWORDS	Acetylation	RT		203	516	3424	20581	38.8	1.6e-35	2.4	5.6e-33	2.8e-33	2.2e-32	6.7e-36
3	UP_KEYWORDS	Ribonucleoprotein	RT		56	516	296	20581	10.7	5.6e-32	7.5	1.9e-29	6.3e-30	7.6e-29	6.2e-33
4	UP_KEYWORDS	Host-virus interaction	RT		42	516	385	20581	8	5.5e-15	4.4	1.8e-12	4.6e-13	7.4e-12	1.1e-15
5	UP_KEYWORDS	Immunity	RT		44	516	500	20581	8.4	1.9e-12	3.5	6.6e-10	1.3e-10	2.6e-09	5.1e-13
6	UP_KEYWORDS	Phosphoprotein	RT		284	516	8246	20581	54.3	3.6e-12	1.4	1.2e-09	2e-10	4.9e-09	2.6e-12
7	UP_KEYWORDS	Ubl conjugation	RT		89	516	1705	20581	17	4.6e-11	2.1	1.5e-08	2.2e-09	6.2e-08	2.1e-11
8	UP_KEYWORDS	Cytoplasm	RT		182	516	4816	20581	34.8	7.3e-10	1.5	2.5e-07	3.1e-08	1e-06	4.8e-10
9	UP_KEYWORDS	Actin-binding	RT		26	516	274	20581	5	2.9e-08	3.8	9.7e-06	1.1e-06	3.9e-05	7e-09
10	UP_KEYWORDS	Isopeptide bond	RT		58	516	1132	20581	11.1	4.1e-07	2	0.00014	1.4e-05	0.00055	1.9e-07
11	UP_KEYWORDS	Diamond-Blackfan anemia	RT		7	516	15	20581	1.3	9.9e-07	18.6	0.00033	3e-05	0.0013	3.2e-08
12	UP_KEYWORDS	MHC I	RT		6	516	10	20581	1.1	2.2e-06	23.9	0.00074	6.1e-05	0.003	4.7e-08
13	UP_KEYWORDS	Threonine protease	RT		7	516	20	20581	1.3	6.9e-06	14	0.0023	0.00018	0.0093	3.5e-07
14	UP_KEYWORDS	rRNA-binding	RT		7	516	24	20581	1.3	2.2e-05	11.6	0.0073	0.00053	0.03	1.4e-06
15	UP_KEYWORDS	MHC II	RT		6	516	17	20581	1.1	4.6e-05	14.1	0.016	0.001	0.063	2.4e-06
16	UP_KEYWORDS	Cytoskeleton	RT		51	516	1138	20581	9.8	8.1e-05	1.8	0.027	0.0017	0.11	4.4e-05
17	UP_KEYWORDS	Prenylation	RT		15	516	168	20581	2.9	8.8e-05	3.6	0.029	0.0017	0.12	2.3e-05
18	UP_KEYWORDS	Zymogen	RT		17	516	214	20581	3.3	0.0001	3.2	0.034	0.0019	0.14	3e-05
19	UP_KEYWORDS	Hydrogen ion transport	RT		8	516	49	20581	1.5	0.0002	6.5	0.066	0.0036	0.28	2.7e-05
20	UP_KEYWORDS	Apoptosis	RT		29	516	536	20581	5.5	0.00022	2.2	0.071	0.0037	0.3	9.7e-05
21	UP_KEYWORDS	Lipoprotein	RT		40	516	852	20581	7.6	0.00022	1.9	0.073	0.0036	0.3	0.00011
22	UP_KEYWORDS	Cytolysis	RT		5	516	14	20581	1	0.00032	14.2	0.1	0.0049	0.43	1.6e-05
23	UP_KEYWORDS	Proteasome	RT		8	516	53	20581	1.5	0.00034	6	0.11	0.0049	0.46	4.9e-05
24	UP_KEYWORDS	Membrane	RT		226	516	7494	20581	43.2	0.00035	1.2	0.11	0.0048	0.47	0.00028
25	UP_KEYWORDS	Lysosome	RT		18	516	263	20581	3.4	0.00036	2.7	0.11	0.0049	0.49	0.00012
26	UP_KEYWORDS	Oxidation	RT		6	516	27	20581	1.1	0.00049	8.9	0.15	0.0064	0.67	4.6e-05
27	UP_KEYWORDS	ATP synthesis	RT		5	516	16	20581	1	0.00056	12.5	0.17	0.0069	0.75	3.4e-05
28	UP_KEYWORDS	ADP-ribosylation	RT		8	516	63	20581	1.5	0.00097	5.1	0.28	0.012	1.3	0.00017
29	UP_KEYWORDS	Adaptive immunity	RT		13	516	174	20581	2.5	0.0015	3	0.39	0.017	2	0.00046
30	UP_KEYWORDS	Disulfide bond	RT		113	516	3434	20581	21.6	0.0015	1.3	0.4	0.017	2	0.0011
31	UP_KEYWORDS	Mitochondrion inner membrane	RT		16	516	270	20581	3.1	0.0035	2.4	0.69	0.037	4.6	0.0014
32	UP_KEYWORDS	Integrin	RT		6	516	45	20581	1.1	0.0052	5.3	0.82	0.053	6.8	0.00086
33	UP_KEYWORDS	Protease	RT		25	516	544	20581	4.8	0.0054	1.8	0.84	0.054	7.2	0.0028
34	UP_KEYWORDS	Electron transport	RT		9	516	108	20581	1.7	0.0058	3.3	0.86	0.056	7.6	0.0016
35	UP_KEYWORDS	Innate immunity	RT		15	516	261	20581	2.9	0.0063	2.3	0.88	0.059	8.2	0.0026
36	UP_KEYWORDS	Protein phosphatase	RT		10	516	133	20581	1.9	0.0063	3	0.88	0.058	8.3	0.0019
37	UP_KEYWORDS	Alternative promoter usage	RT		8	516	90	20581	1.5	0.0074	3.5	0.92	0.065	9.6	0.0019
38	UP_KEYWORDS	Redox-active center	RT		6	516	49	20581	1.1	0.0074	4.9	0.92	0.064	9.6	0.0014
39	UP_KEYWORDS	SCID	RT		4	516	18	20581	0.8	0.0096	8.9	0.96	0.08	12	0.0009
40	UP_KEYWORDS	RNA-binding	RT		28	516	665	20581	5.4	0.0098	1.7	0.96	0.08	13	0.0056
41	UP_KEYWORDS	Signal-anchor	RT		21	516	455	20581	4	0.011	1.8	0.98	0.088	14	0.0057
42	UP_KEYWORDS	Cell adhesion	RT		21	516	479	20581	4	0.018	1.7	1	0.14	22	0.0099
43	UP_KEYWORDS	Endosome	RT		21	516	481	20581	4	0.019	1.7	1	0.14	23	0.01
44	UP_KEYWORDS	Immunoglobulin domain	RT		23	516	546	20581	4.4	0.02	1.7	1	0.14	24	0.011
45	UP_KEYWORDS	Host cell receptor for virus entry	RT		6	516	64	20581	1.1	0.022	3.7	1	0.15	26	0.0053
46	UP_KEYWORDS	Cell membrane	RT		97	516	3175	20581	18.5	0.026	1.2	1	0.18	30	0.021
47	UP_KEYWORDS	Lectin	RT		10	516	171	20581	1.9	0.028	2.3	1	0.19	33	0.011
48	UP_KEYWORDS	Methylation	RT		36	516	1001	20581	6.9	0.029	1.4	1	0.18	33	0.019
49	UP_KEYWORDS	Hydrolase	RT		55	516	1671	20581	10.5	0.032	1.3	1	0.2	35	0.023
50	UP_KEYWORDS	Elongation factor	RT		4	516	30	20581	0.8	0.038	5.3	1	0.23	41	0.0064
51	UP_KEYWORDS	Myosin	RT		5	516	51	20581	1	0.038	3.9	1	0.23	41	0.0088
52	UP_KEYWORDS	Annexin	RT		3	516	14	20581	0.6	0.047	8.5	1	0.27	48	0.0046
53	UP_KEYWORDS	CF(0)	RT		3	516	14	20581	0.6	0.047	8.5	1	0.27	48	0.0046
54	UP_KEYWORDS	GTP-binding	RT		15	516	343	20581	2.9	0.051	1.7	1	0.28	51	0.027
55	UP_KEYWORDS	Calcium/phospholipid-binding	RT		3	516	15	20581	0.6	0.053	8	1	0.29	52	0.0057
56	UP_KEYWORDS	SH2 domain	RT		7	516	108	20581	1.3	0.054	2.6	1	0.29	53	0.019
57	UP_KEYWORDS	Myristate	RT		10	516	195	20581	1.9	0.057	2	1	0.3	55	0.026
58	UP_KEYWORDS	Receptor	RT		52	516	1648	20581	9.9	0.066	1.3	1	0.33	60	0.051
59	UP_KEYWORDS	Chaperone	RT		10	516	201	20581	1.9	0.067	2	1	0.33	61	0.031
60	UP_KEYWORDS	Respiratory chain	RT		5	516	63	20581	1	0.073	3.2	1	0.35	64	0.021
61	UP_KEYWORDS	Proto-oncogene	RT		11	516	236	20581	2.1	0.074	1.9	1	0.35	65	0.036
62	UP_KEYWORDS	Mitochondrion	RT		37	516	1119	20581	7.1	0.076	1.3	1	0.35	66	0.053
63	UP_KEYWORDS	Calcium	RT		30	516	877	20581	5.7	0.079	1.4	1	0.36	67	0.054
64	UP_KEYWORDS	Thiol protease	RT		8	516	153	20581	1.5	0.09	2.1	1	0.4	72	0.039
65	UP_KEYWORDS	SH3 domain	RT		10	516	215	20581	1.9	0.092	1.9	1	0.4	73	0.045
	33 gene(s)	from your list are not in the output.

## Sheet: Phosphoprotein_List
OFFICIAL_GENE_SYMBOL	GENE NAME
ABI3	ABI family member 3(ABI3)
ATP5I	ATP synthase, H+ transporting, mitochondrial Fo complex subunit E(ATP5I)
ATP6V1E1	ATPase H+ transporting V1 subunit E1(ATP6V1E1)
BTG1	BTG anti-proliferation factor 1(BTG1)
CX3CR1	C-X3-C motif chemokine receptor 1(CX3CR1)
CTBP2	C-terminal binding protein 2(CTBP2)
CD2BP2	CD2 cytoplasmic tail binding protein 2(CD2BP2)
CD247	CD247 molecule(CD247)
CD27	CD27 molecule(CD27)
CD28	CD28 molecule(CD28)
CD300A	CD300a molecule(CD300A)
CD3D	CD3d molecule(CD3D)
CD3E	CD3e molecule(CD3E)
CD3G	CD3g molecule(CD3G)
CD44	CD44 molecule (Indian blood group)(CD44)
CD6	CD6 molecule(CD6)
CD74	CD74 molecule(CD74)
CD79A	CD79a molecule(CD79A)
CD99	CD99 molecule(CD99)
CDC42EP3	CDC42 effector protein 3(CDC42EP3)
COPS9	COP9 signalosome subunit 9(COPS9)
DDX3X	DEAD-box helicase 3, X-linked(DDX3X)
DDX6	DEAD-box helicase 6(DDX6)
DNAJC1	DnaJ heat shock protein family (Hsp40) member C1(DNAJC1)
EFHD2	EF-hand domain family member D2(EFHD2)
ETHE1	ETHE1, persulfide dioxygenase(ETHE1)
FGR	FGR proto-oncogene, Src family tyrosine kinase(FGR)
FKBP8	FK506 binding protein 8(FKBP8)
FCRL6	Fc receptor like 6(FCRL6)
FOS	Fos proto-oncogene, AP-1 transcription factor subunit(FOS)
GNG5	G protein subunit gamma 5(GNG5)
GPR183	G protein-coupled receptor 183(GPR183)
GATA3	GATA binding protein 3(GATA3)
JUN	Jun proto-oncogene, AP-1 transcription factor subunit(JUN)
JUNB	JunB proto-oncogene, AP-1 transcription factor subunit(JUNB)
KLF2	Kruppel like factor 2(KLF2)
LCK	LCK proto-oncogene, Src family tyrosine kinase(LCK)
MCRIP1	MAPK regulated corepressor interacting protein 1(MCRIP1)
NDUFB10	NADH:ubiquinone oxidoreductase subunit B10(NDUFB10)
NDUFB7	NADH:ubiquinone oxidoreductase subunit B7(NDUFB7)
NFKBIA	NFKB inhibitor alpha(NFKBIA)
ORAI1	ORAI calcium release-activated calcium modulator 1(ORAI1)
PARK7	Parkinsonism associated deglycase(PARK7)
RAB9A	RAB9A, member RAS oncogene family(RAB9A)
RAN	RAN, member RAS oncogene family(RAN)
RAP1B	RAP1B, member of RAS oncogene family(RAP1B)
RBM22	RNA binding motif protein 22(RBM22)
RASSF1	Ras association domain family member 1(RASSF1)
ARHGDIB	Rho GDP dissociation inhibitor beta(ARHGDIB)
ARHGAP15	Rho GTPase activating protein 15(ARHGAP15)
ARHGAP9	Rho GTPase activating protein 9(ARHGAP9)
S100A6	S100 calcium binding protein A6(S100A6)
SATB1	SATB homeobox 1(SATB1)
SH3BP5	SH3 domain binding protein 5(SH3BP5)
SH3GLB1	SH3 domain containing GRB2 like endophilin B1(SH3GLB1)
SLC9A3R1	SLC9A3 regulator 1(SLC9A3R1)
SUB1	SUB1 homolog, transcriptional regulator(SUB1)
SUN2	Sad1 and UNC84 domain containing 2(SUN2)
TRAT1	T cell receptor associated transmembrane adaptor 1(TRAT1)
TMEM9B	TMEM9 domain family member B(TMEM9B)
TNFAIP3	TNF alpha induced protein 3(TNFAIP3)
TNFRSF14	TNF receptor superfamily member 14(TNFRSF14)
TSPYL2	TSPY like 2(TSPYL2)
TYROBP	TYRO protein tyrosine kinase binding protein(TYROBP)
WDR1	WD repeat domain 1(WDR1)
XBP1	X-box binding protein 1(XBP1)
YBX3	Y-box binding protein 3(YBX3)
ZFP36L2	ZFP36 ring finger protein like 2(ZFP36L2)
ABHD17A	abhydrolase domain containing 17A(ABHD17A)
ARPC3	actin related protein 2/3 complex subunit 3(ARPC3)
ARPC5L	actin related protein 2/3 complex subunit 5 like(ARPC5L)
ACTN4	actinin alpha 4(ACTN4)
CAP1	adenylate cyclase associated protein 1(CAP1)
ADGRE5	adhesion G protein-coupled receptor E5(ADGRE5)
APMAP	adipocyte plasma membrane associated protein(APMAP)
AKR1B1	aldo-keto reductase family 1 member B(AKR1B1)
AES	amino-terminal enhancer of split(AES)
AGTRAP	angiotensin II receptor associated protein(AGTRAP)
ANXA2	annexin A2(ANXA2)
ANXA4	annexin A4(ANXA4)
ANXA6	annexin A6(ANXA6)
APOBEC3G	apolipoprotein B mRNA editing enzyme catalytic subunit 3G(APOBEC3G)
JMJD6	arginine demethylase and lysine hydroxylase(JMJD6)
BHLHE40	basic helix-loop-helix family member e40(BHLHE40)
BSG	basigin (Ok blood group)(BSG)
BIN2	bridging integrator 2(BIN2)
CAMK4	calcium/calmodulin dependent protein kinase IV(CAMK4)
CALM1	calmodulin 1(CALM1)
CAPN1	calpain 1(CAPN1)
CAPNS1	calpain small subunit 1(CAPNS1)
CNN2	calponin 2(CNN2)
CAPZB	capping actin protein of muscle Z-line beta subunit(CAPZB)
CAPG	capping actin protein, gelsolin like(CAPG)
CES1	carboxylesterase 1(CES1)
CASP1	caspase 1(CASP1)
CASP4	caspase 4(CASP4)
CASP8	caspase 8(CASP8)
COMT	catechol-O-methyltransferase(COMT)
CDC25B	cell division cycle 25B(CDC25B)
CDC42	cell division cycle 42(CDC42)
CEP78	centrosomal protein 78(CEP78)
CHMP4B	charged multivesicular body protein 4B(CHMP4B)
CLIC1	chloride intracellular channel 1(CLIC1)
CLIC3	chloride intracellular channel 3(CLIC3)
CBX6	chromobox 6(CBX6)
C1orf21	chromosome 1 open reading frame 21(C1orf21)
C1orf56	chromosome 1 open reading frame 56(C1orf56)
C9orf16	chromosome 9 open reading frame 16(C9orf16)
F2R	coagulation factor II thrombin receptor(F2R)
COPE	coatomer protein complex subunit epsilon(COPE)
CFL1	cofilin 1(CFL1)
CCDC69	coiled-coil domain containing 69(CCDC69)
CCDC88C	coiled-coil domain containing 88C(CCDC88C)
COL6A2	collagen type VI alpha 2 chain(COL6A2)
CORO1A	coronin 1A(CORO1A)
CCND3	cyclin D3(CCND3)
CYBA	cytochrome b-245 alpha chain(CYBA)
CYB5B	cytochrome b5 type B(CYB5B)
CYC1	cytochrome c1(CYC1)
DERL1	derlin 1(DERL1)
DSTN	destrin, actin depolymerizing factor(DSTN)
DBI	diazepam binding inhibitor, acyl-CoA binding protein(DBI)
DOK2	docking protein 2(DOK2)
DUSP1	dual specificity phosphatase 1(DUSP1)
DYNLL1	dynein light chain LC8-type 1(DYNLL1)
DTNBP1	dystrobrevin binding protein 1(DTNBP1)
EML4	echinoderm microtubule associated protein like 4(EML4)
ENSA	endosulfine alpha(ENSA)
ERH	enhancer of rudimentary homolog (Drosophila)(ERH)
EEF1A1	eukaryotic translation elongation factor 1 alpha 1(EEF1A1)
EEF1B2	eukaryotic translation elongation factor 1 beta 2(EEF1B2)
EIF3E	eukaryotic translation initiation factor 3 subunit E(EIF3E)
FEZ1	fasciculation and elongation protein zeta 1(FEZ1)
FLNA	filamin A(FLNA)
FMNL1	formin like 1(FMNL1)
LGALS1	galectin 1(LGALS1)
GTF3C1	general transcription factor IIIC subunit 1(GTF3C1)
GLTSCR2	glioma tumor suppressor candidate region gene 2(GLTSCR2)
G6PD	glucose-6-phosphate dehydrogenase(G6PD)
GSTP1	glutathione S-transferase pi 1(GSTP1)
GAPDH	glyceraldehyde-3-phosphate dehydrogenase(GAPDH)
HSP90AB1	heat shock protein 90 alpha family class B member 1(HSP90AB1)
HCST	hematopoietic cell signal transducer(HCST)
HNRNPF	heterogeneous nuclear ribonucleoprotein F(HNRNPF)
HMGN2	high mobility group nucleosomal binding domain 2(HMGN2)
HINT1	histidine triad nucleotide binding protein 1(HINT1)
IKBKG	inhibitor of kappa light polypeptide gene enhancer in B-cells, kinase gamma(IKBKG)
ITM2C	integral membrane protein 2C(ITM2C)
ITGAL	integrin subunit alpha L(ITGAL)
ITGB1BP1	integrin subunit beta 1 binding protein 1(ITGB1BP1)
ITGB1	integrin subunit beta 1(ITGB1)
ITGB2	integrin subunit beta 2(ITGB2)
ITGB7	integrin subunit beta 7(ITGB7)
IL2RG	interleukin 2 receptor subunit gamma(IL2RG)
IL7R	interleukin 7 receptor(IL7R)
LDHB	lactate dehydrogenase B(LDHB)
LMNA	lamin A/C(LMNA)
LST1	leukocyte specific transcript 1(LST1)
LAT	linker for activation of T-cells(LAT)
LDLRAP1	low density lipoprotein receptor adaptor protein 1(LDLRAP1)
LCP1	lymphocyte cytosolic protein 1(LCP1)
LSP1	lymphocyte-specific protein 1(LSP1)
LEF1	lymphoid enhancer binding factor 1(LEF1)
HLA-A	major histocompatibility complex, class I, A(HLA-A)
MATK	megakaryocyte-associated tyrosine kinase(MATK)
MS4A1	membrane spanning 4-domains A1(MS4A1)
MAP1LC3B	microtubule associated protein 1 light chain 3 beta(MAP1LC3B)
MAPK1	mitogen-activated protein kinase 1(MAPK1)
MSN	moesin(MSN)
MYO1F	myosin IF(MYO1F)
MYL12A	myosin light chain 12A(MYL12A)
MYL12B	myosin light chain 12B(MYL12B)
MYL6	myosin light chain 6(MYL6)
NCF1	neutrophil cytosolic factor 1(NCF1)
NOSIP	nitric oxide synthase interacting protein(NOSIP)
NARF	nuclear prelamin A recognition factor(NARF)
NPM1	nucleophosmin(NPM1)
NAP1L1	nucleosome assembly protein 1 like 1(NAP1L1)
OSTF1	osteoclast stimulating factor 1(OSTF1)
PPDPF	pancreatic progenitor cell differentiation and proliferation factor(PPDPF)
PTMS	parathymosin(PTMS)
PXN	paxillin(PXN)
PLIN2	perilipin 2(PLIN2)
PDE4B	phosphodiesterase 4B(PDE4B)
PGAM1	phosphoglycerate mutase 1(PGAM1)
PIK3R1	phosphoinositide-3-kinase regulatory subunit 1(PIK3R1)
PNN	pinin, desmosome associated protein(PNN)
PLEK	pleckstrin(PLEK)
PABPC1	poly(A) binding protein cytoplasmic 1(PABPC1)
KCNAB2	potassium voltage-gated channel subfamily A regulatory beta subunit 2(KCNAB2)
PFN1	profilin 1(PFN1)
PDCD4	programmed cell death 4 (neoplastic transformation inhibitor)(PDCD4)
P4HB	prolyl 4-hydroxylase subunit beta(P4HB)
PRSS23	protease, serine 23(PRSS23)
PSMD8	proteasome 26S subunit, non-ATPase 8(PSMD8)
PSMA1	proteasome subunit alpha 1(PSMA1)
PSMA4	proteasome subunit alpha 4(PSMA4)
PSMB1	proteasome subunit beta 1(PSMB1)
PSMB10	proteasome subunit beta 10(PSMB10)
PSMB6	proteasome subunit beta 6(PSMB6)
PSMB8	proteasome subunit beta 8(PSMB8)
PDIA3	protein disulfide isomerase family A member 3(PDIA3)
PPP1CA	protein phosphatase 1 catalytic subunit alpha(PPP1CA)
PPP1R18	protein phosphatase 1 regulatory subunit 18(PPP1R18)
PPP2R5C	protein phosphatase 2 regulatory subunit B'gamma(PPP2R5C)
PTPN18	protein tyrosine phosphatase, non-receptor type 18(PTPN18)
PTPN4	protein tyrosine phosphatase, non-receptor type 4(PTPN4)
PTPN6	protein tyrosine phosphatase, non-receptor type 6(PTPN6)
PTPN7	protein tyrosine phosphatase, non-receptor type 7(PTPN7)
PPA1	pyrophosphatase (inorganic) 1(PPA1)
RHOA	ras homolog family member A(RHOA)
RHOG	ras homolog family member G(RHOG)
RGCC	regulator of cell cycle(RGCC)
RPL10A	ribosomal protein L10a(RPL10A)
RPL11	ribosomal protein L11(RPL11)
RPL12	ribosomal protein L12(RPL12)
RPL13	ribosomal protein L13(RPL13)
RPL13A	ribosomal protein L13a(RPL13A)
RPL18	ribosomal protein L18(RPL18)
RPL18A	ribosomal protein L18a(RPL18A)
RPL19	ribosomal protein L19(RPL19)
RPL22	ribosomal protein L22(RPL22)
RPL28	ribosomal protein L28(RPL28)
RPL30	ribosomal protein L30(RPL30)
RPL32	ribosomal protein L32(RPL32)
RPL34	ribosomal protein L34(RPL34)
RPL37	ribosomal protein L37(RPL37)
RPL4	ribosomal protein L4(RPL4)
RPL5	ribosomal protein L5(RPL5)
RPS13	ribosomal protein S13(RPS13)
RPS17	ribosomal protein S17(RPS17)
RPS2	ribosomal protein S2(RPS2)
RPS20	ribosomal protein S20(RPS20)
RPS27	ribosomal protein S27(RPS27)
RPS28	ribosomal protein S28(RPS28)
RPS29	ribosomal protein S29(RPS29)
RPS5	ribosomal protein S5(RPS5)
RPS6	ribosomal protein S6(RPS6)
RPS8	ribosomal protein S8(RPS8)
RPS9	ribosomal protein S9(RPS9)
RPSA	ribosomal protein SA(RPSA)
RPLP0	ribosomal protein lateral stalk subunit P0(RPLP0)
RPLP1	ribosomal protein lateral stalk subunit P1(RPLP1)
RPLP2	ribosomal protein lateral stalk subunit P2(RPLP2)
RNF130	ring finger protein 130(RNF130)
RBX1	ring-box 1(RBX1)
RUNX3	runt related transcription factor 3(RUNX3)
SCAMP2	secretory carrier membrane protein 2(SCAMP2)
SELPLG	selectin P ligand(SELPLG)
STK10	serine/threonine kinase 10(STK10)
SERPINB1	serpin family B member 1(SERPINB1)
SPN	sialophorin(SPN)
SRP14	signal recognition particle 14(SRP14)
SSBP4	single stranded DNA binding protein 4(SSBP4)
SIRT2	sirtuin 2(SIRT2)
SUMO1	small ubiquitin-like modifier 1(SUMO1)
SLC2A3	solute carrier family 2 member 3(SLC2A3)
SLC44A2	solute carrier family 44 member 2(SLC44A2)
S1PR5	sphingosine-1-phosphate receptor 5(S1PR5)
STMN1	stathmin 1(STMN1)
SLBP	stem-loop binding protein(SLBP)
SCP2	sterol carrier protein 2(SCP2)
SOCS3	suppressor of cytokine signaling 3(SOCS3)
STX8	syntaxin 8(STX8)
TSEN54	tRNA splicing endonuclease subunit 54(TSEN54)
TTC38	tetratricopeptide repeat domain 38(TTC38)
TXNIP	thioredoxin interacting protein(TXNIP)
TMSB10	thymosin beta 10(TMSB10)
TMSB4X	thymosin beta 4, X-linked(TMSB4X)
TCEB2	transcription elongation factor B subunit 2(TCEB2)
TFDP2	transcription factor Dp-2(TFDP2)
TMEM173	transmembrane protein 173(TMEM173)
TMEM50A	transmembrane protein 50A(TMEM50A)
TBCB	tubulin folding cofactor B(TBCB)
TWF2	twinfilin actin binding protein 2(TWF2)
YWHAQ	tyrosine 3-monooxygenase/tryptophan 5-monooxygenase activation protein theta(YWHAQ)
UBB	ubiquitin B(UBB)
UBE2A	ubiquitin conjugating enzyme E2 A(UBE2A)
MYC	v-myc avian myelocytomatosis viral oncogene homolog(MYC)
VIM	vimentin(VIM)
VDAC3	voltage dependent anion channel 3(VDAC3)
ZAP70	zeta chain of T cell receptor associated protein kinase 70(ZAP70)
ZFAND6	zinc finger AN1-type containing 6(ZFAND6)
ZEB2	zinc finger E-box binding homeobox 2(ZEB2)

## Sheet: KEGG_Pho_List
Category	Term	RT	Genes	Count	LT	PH	PT	%	P-Value	Fold Enrichment	Bonferroni	Benjamini	FDR	Fisher Exact
KEGG_PATHWAY	Ribosome	RT		31	182	136	6879	10.9	3.7e-20	8.6	7.6e-18	7.6e-18	4.7e-17	3.5e-21
KEGG_PATHWAY	Regulation of actin cytoskeleton	RT		20	182	210	6879	7	2.2e-06	3.6	0.00045	9e-05	0.0028	5.7e-07
KEGG_PATHWAY	Pathways in cancer	RT		20	182	393	6879	7	0.0072	1.9	0.77	0.048	8.7	0.0035
KEGG_PATHWAY	HTLV-I infection	RT		18	182	254	6879	6.3	0.00035	2.7	0.068	0.0064	0.44	0.00012
KEGG_PATHWAY	T cell receptor signaling pathway	RT		17	182	100	6879	6	5.3e-09	6.4	1.1e-06	5.4e-07	6.7e-06	7.1e-10
KEGG_PATHWAY	Focal adhesion	RT		16	182	206	6879	5.6	0.00032	2.9	0.063	0.0072	0.4	0.0001
KEGG_PATHWAY	PI3K-Akt signaling pathway	RT		16	182	345	6879	5.6	0.038	1.8	1	0.19	38	0.02
KEGG_PATHWAY	Leukocyte transendothelial migration	RT		15	182	115	6879	5.3	1.6e-06	4.9	0.00033	0.00011	0.002	2.9e-07
KEGG_PATHWAY	Viral carcinogenesis	RT		15	182	205	6879	5.3	0.00096	2.8	0.18	0.012	1.2	0.00032
KEGG_PATHWAY	Proteoglycans in cancer	RT		14	182	200	6879	4.9	0.0022	2.6	0.36	0.021	2.8	0.0008
KEGG_PATHWAY	Osteoclast differentiation	RT		13	182	131	6879	4.6	0.00016	3.8	0.031	0.0046	0.2	3.9e-05
KEGG_PATHWAY	cAMP signaling pathway	RT		13	182	198	6879	4.6	0.0058	2.5	0.69	0.043	7.1	0.0022
KEGG_PATHWAY	Epstein-Barr virus infection	RT		12	182	122	6879	4.2	0.00034	3.7	0.067	0.0069	0.43	8.4e-05
KEGG_PATHWAY	Chemokine signaling pathway	RT		12	182	186	6879	4.2	0.0097	2.4	0.86	0.06	12	0.0037
KEGG_PATHWAY	Rap1 signaling pathway	RT		12	182	210	6879	4.2	0.023	2.2	0.99	0.12	25	0.0096
KEGG_PATHWAY	MAPK signaling pathway	RT		12	182	253	6879	4.2	0.07	1.8	1	0.28	60	0.036
KEGG_PATHWAY	Chagas disease (American trypanosomiasis)	RT		11	182	104	6879	3.9	0.00038	4	0.074	0.0064	0.48	8.6e-05
KEGG_PATHWAY	Neurotrophin signaling pathway	RT		11	182	120	6879	3.9	0.0012	3.5	0.21	0.014	1.5	0.00031
KEGG_PATHWAY	Natural killer cell mediated cytotoxicity	RT		11	182	122	6879	3.9	0.0013	3.4	0.24	0.015	1.7	0.00036
KEGG_PATHWAY	Measles	RT		11	182	133	6879	3.9	0.0026	3.1	0.4	0.023	3.2	0.00075
KEGG_PATHWAY	Hepatitis B	RT		11	182	145	6879	3.9	0.0048	2.9	0.62	0.038	5.8	0.0015
KEGG_PATHWAY	Herpes simplex infection	RT		11	182	183	6879	3.9	0.022	2.3	0.99	0.13	25	0.009
KEGG_PATHWAY	Ras signaling pathway	RT		11	182	226	6879	3.9	0.074	1.8	1	0.29	62	0.037
KEGG_PATHWAY	Shigellosis	RT		10	182	64	6879	3.5	3.9e-05	5.9	0.0079	0.0013	0.049	5.8e-06
KEGG_PATHWAY	Salmonella infection	RT		10	182	83	6879	3.5	0.0003	4.6	0.06	0.0077	0.38	6e-05
KEGG_PATHWAY	TNF signaling pathway	RT		10	182	107	6879	3.5	0.0019	3.5	0.32	0.02	2.4	0.0005
KEGG_PATHWAY	Platelet activation	RT		10	182	130	6879	3.5	0.0071	2.9	0.76	0.048	8.6	0.0022
KEGG_PATHWAY	Cell adhesion molecules (CAMs)	RT		10	182	142	6879	3.5	0.012	2.7	0.92	0.073	14	0.0043
KEGG_PATHWAY	Primary immunodeficiency	RT		9	182	34	6879	3.2	2e-06	10	0.0004	0.0001	0.0025	1.5e-07
KEGG_PATHWAY	Leishmaniasis	RT		9	182	71	6879	3.2	0.00051	4.8	0.098	0.0079	0.64	9.4e-05
KEGG_PATHWAY	Pertussis	RT		9	182	75	6879	3.2	0.00074	4.5	0.14	0.011	0.92	0.00015
KEGG_PATHWAY	Non-alcoholic fatty liver disease (NAFLD)	RT		9	182	151	6879	3.2	0.045	2.3	1	0.21	44	0.018
KEGG_PATHWAY	B cell receptor signaling pathway	RT		8	182	69	6879	2.8	0.0021	4.4	0.35	0.021	2.6	0.00043
KEGG_PATHWAY	Bacterial invasion of epithelial cells	RT		8	182	78	6879	2.8	0.0043	3.9	0.58	0.035	5.2	0.00099
KEGG_PATHWAY	Fc gamma R-mediated phagocytosis	RT		8	182	84	6879	2.8	0.0064	3.6	0.73	0.045	7.7	0.0016
KEGG_PATHWAY	Proteasome	RT		7	182	44	6879	2.5	0.00094	6	0.17	0.013	1.2	0.00014
KEGG_PATHWAY	NOD-like receptor signaling pathway	RT		7	182	56	6879	2.5	0.0033	4.7	0.49	0.029	4.1	0.00063
KEGG_PATHWAY	Colorectal cancer	RT		7	182	62	6879	2.5	0.0055	4.3	0.67	0.042	6.7	0.0012
KEGG_PATHWAY	Renal cell carcinoma	RT		7	182	66	6879	2.5	0.0075	4	0.78	0.048	9	0.0017
KEGG_PATHWAY	Toll-like receptor signaling pathway	RT		7	182	106	6879	2.5	0.06	2.5	1	0.25	54	0.022
KEGG_PATHWAY	Adherens junction	RT		6	182	71	6879	2.1	0.038	3.2	1	0.19	39	0.011
KEGG_PATHWAY	Chronic myeloid leukemia	RT		6	182	72	6879	2.1	0.04	3.1	1	0.2	40	0.012
KEGG_PATHWAY	Tight junction	RT		6	182	87	6879	2.1	0.079	2.6	1	0.3	64	0.027
KEGG_PATHWAY	Hematopoietic cell lineage	RT		6	182	87	6879	2.1	0.079	2.6	1	0.3	64	0.027
KEGG_PATHWAY	NF-kappa B signaling pathway	RT		6	182	87	6879	2.1	0.079	2.6	1	0.3	64	0.027
KEGG_PATHWAY	Rheumatoid arthritis	RT		6	182	88	6879	2.1	0.082	2.6	1	0.3	66	0.029
KEGG_PATHWAY	Prostate cancer	RT		6	182	88	6879	2.1	0.082	2.6	1	0.3	66	0.029
KEGG_PATHWAY	Pathogenic Escherichia coli infection	RT		5	182	51	6879	1.8	0.044	3.7	1	0.21	43	0.011
KEGG_PATHWAY	Legionellosis	RT		5	182	54	6879	1.8	0.053	3.5	1	0.24	49	0.014
KEGG_PATHWAY	Acute myeloid leukemia	RT		5	182	56	6879	1.8	0.059	3.4	1	0.25	53	0.016
KEGG_PATHWAY	Viral myocarditis	RT		5	182	57	6879	1.8	0.062	3.3	1	0.26	55	0.017
KEGG_PATHWAY	Apoptosis	RT		5	182	62	6879	1.8	0.08	3	1	0.3	65	0.024
KEGG_PATHWAY	Central carbon metabolism in cancer	RT		5	182	64	6879	1.8	0.087	3	1	0.31	68	0.027
KEGG_PATHWAY	Long-term potentiation	RT		5	182	66	6879	1.8	0.095	2.9	1	0.33	72	0.03
KEGG_PATHWAY	Amphetamine addiction	RT		5	182	66	6879	1.8	0.095	2.9	1	0.33	72	0.03
KEGG_PATHWAY	Epithelial cell signaling in Helicobacter pylori infection	RT		5	182	67	6879	1.8	0.099	2.8	1	0.33	73	0.032
	147 gene(s) from your list are not in the output

## Sheet: GO_Pho_List
Category	Term	RT	Genes	Count	LT	PH	PT	%	P-Value	Fold Enrichment	Bonferroni	Benjamini	FDR	Fisher Exact
GOTERM_BP_DIRECT	signal transduction	RT		39	271	1161	16792	13.7	2.2e-05	2.1	0.042	0.0022	0.039	1e-05
GOTERM_BP_DIRECT	nuclear-transcribed mRNA catabolic process, nonsense-mediated decay	RT		33	271	119	16792	11.6	1.7e-30	17.2	3.4e-27	1.7e-27	3e-27	7.6e-32
GOTERM_BP_DIRECT	translational initiation	RT		33	271	137	16792	11.6	2.4e-28	14.9	4.6e-25	1.1e-25	4.1e-25	1.2e-29
GOTERM_BP_DIRECT	SRP-dependent cotranslational protein targeting to membrane	RT		32	271	94	16792	11.3	1.1e-32	21.1	2.2e-29	2.2e-29	2e-29	3.7e-34
GOTERM_BP_DIRECT	viral transcription	RT		31	271	112	16792	10.9	1.4e-28	17.2	2.7e-25	9.1e-26	2.4e-25	6.2e-30
GOTERM_BP_DIRECT	rRNA processing	RT		31	271	214	16792	10.9	7.5e-20	9	1.4e-16	2.9e-17	1.3e-16	7.3e-21
GOTERM_BP_DIRECT	translation	RT		31	271	253	16792	10.9	9.1e-18	7.6	1.8e-14	2.9e-15	1.6e-14	1.1e-18
GOTERM_BP_DIRECT	positive regulation of transcription from RNA polymerase II promoter	RT		26	271	981	16792	9.2	0.015	1.6	1	0.28	23	0.0089
GOTERM_BP_DIRECT	T cell receptor signaling pathway	RT		23	271	148	16792	8.1	2.3e-15	9.6	4.5e-12	6.4e-13	4e-12	1.9e-16
GOTERM_BP_DIRECT	negative regulation of apoptotic process	RT		23	271	455	16792	8.1	4.7e-06	3.1	0.009	0.00056	0.008	1.4e-06
GOTERM_BP_DIRECT	viral process	RT		22	271	299	16792	7.7	1.7e-08	4.6	3.3e-05	4.1e-06	2.9e-05	3.5e-09
GOTERM_BP_DIRECT	cell-cell adhesion	RT		19	271	271	16792	6.7	4.2e-07	4.3	0.00081	6.8e-05	0.00072	9.1e-08
GOTERM_BP_DIRECT	positive regulation of cell proliferation	RT		18	271	466	16792	6.3	0.0015	2.4	0.95	0.059	2.5	0.00059
GOTERM_BP_DIRECT	apoptotic process	RT		18	271	567	16792	6.3	0.01	2	1	0.22	16	0.005
GOTERM_BP_DIRECT	innate immune response	RT		17	271	430	16792	6	0.0017	2.4	0.96	0.061	2.8	0.00064
GOTERM_BP_DIRECT	Fc-epsilon receptor signaling pathway	RT		16	271	178	16792	5.6	1.9e-07	5.6	0.00037	3.4e-05	0.00033	3.2e-08
GOTERM_BP_DIRECT	inflammatory response	RT		15	271	379	16792	5.3	0.0034	2.5	1	0.11	5.6	0.0013
GOTERM_BP_DIRECT	leukocyte migration	RT		14	271	122	16792	4.9	8.3e-08	7.1	0.00016	1.6e-05	0.00014	1.1e-08
GOTERM_BP_DIRECT	MAPK cascade	RT		14	271	262	16792	4.9	0.00034	3.3	0.48	0.017	0.57	9.5e-05
GOTERM_BP_DIRECT	cell surface receptor signaling pathway	RT		14	271	274	16792	4.9	0.00051	3.2	0.63	0.023	0.88	0.00015
GOTERM_BP_DIRECT	immune response	RT		14	271	421	16792	4.9	0.019	2.1	1	0.31	28	0.0087
GOTERM_BP_DIRECT	cell adhesion	RT		14	271	459	16792	4.9	0.035	1.9	1	0.45	46	0.017
GOTERM_BP_DIRECT	actin cytoskeleton organization	RT		13	271	130	16792	4.6	1.3e-06	6.2	0.0024	0.00017	0.0021	1.8e-07
GOTERM_BP_DIRECT	positive regulation of gene expression	RT		13	271	262	16792	4.6	0.0011	3.1	0.89	0.048	1.9	0.00035
GOTERM_BP_DIRECT	T cell costimulation	RT		12	271	78	16792	4.2	4.5e-08	9.5	8.8e-05	9.7e-06	7.8e-05	4.1e-09
GOTERM_BP_DIRECT	regulation of cell shape	RT		12	271	140	16792	4.2	1.6e-05	5.3	0.031	0.0018	0.028	2.9e-06
GOTERM_BP_DIRECT	regulation of immune response	RT		12	271	178	16792	4.2	0.00015	4.2	0.25	0.0095	0.25	3.3e-05
GOTERM_BP_DIRECT	proteasome-mediated ubiquitin-dependent protein catabolic process	RT		12	271	203	16792	4.2	0.00046	3.7	0.59	0.022	0.78	0.00012
GOTERM_BP_DIRECT	response to drug	RT		12	271	304	16792	4.2	0.01	2.4	1	0.22	16	0.004
GOTERM_BP_DIRECT	negative regulation of cell proliferation	RT		12	271	396	16792	4.2	0.056	1.9	1	0.58	63	0.028
GOTERM_BP_DIRECT	intracellular signal transduction	RT		12	271	403	16792	4.2	0.062	1.8	1	0.61	67	0.031
GOTERM_BP_DIRECT	Wnt signaling pathway, planar cell polarity pathway	RT		11	271	92	16792	3.9	2.2e-06	7.4	0.0043	0.00028	0.0038	2.7e-07
GOTERM_BP_DIRECT	negative regulation of canonical Wnt signaling pathway	RT		11	271	163	16792	3.9	0.00031	4.2	0.45	0.016	0.53	6.9e-05
GOTERM_BP_DIRECT	antigen processing and presentation of exogenous peptide antigen via MHC class I, TAP-dependent	RT		10	271	63	16792	3.5	7e-07	9.8	0.0013	0.0001	0.0012	6.1e-08
GOTERM_BP_DIRECT	movement of cell or subcellular component	RT		10	271	86	16792	3.5	9.8e-06	7.2	0.019	0.0011	0.017	1.2e-06
GOTERM_BP_DIRECT	regulation of mRNA stability	RT		10	271	103	16792	3.5	4.2e-05	6	0.078	0.0037	0.072	6.4e-06
GOTERM_BP_DIRECT	stimulatory C-type lectin receptor signaling pathway	RT		10	271	105	16792	3.5	4.9e-05	5.9	0.091	0.0041	0.084	7.6e-06
GOTERM_BP_DIRECT	tumor necrosis factor-mediated signaling pathway	RT		10	271	118	16792	3.5	0.00012	5.3	0.21	0.0087	0.21	2.1e-05
GOTERM_BP_DIRECT	positive regulation of I-kappaB kinase/NF-kappaB signaling	RT		10	271	161	16792	3.5	0.0012	3.8	0.9	0.049	2	0.00029
GOTERM_BP_DIRECT	response to lipopolysaccharide	RT		10	271	164	16792	3.5	0.0014	3.8	0.93	0.055	2.3	0.00034
GOTERM_BP_DIRECT	protein polyubiquitination	RT		10	271	184	16792	3.5	0.003	3.4	1	0.1	5	0.00083
GOTERM_BP_DIRECT	integrin-mediated signaling pathway	RT		9	271	99	16792	3.2	0.0002	5.6	0.31	0.012	0.33	3.2e-05
GOTERM_BP_DIRECT	platelet activation	RT		9	271	115	16792	3.2	0.00054	4.8	0.65	0.024	0.92	0.0001
GOTERM_BP_DIRECT	positive regulation of cell migration	RT		9	271	184	16792	3.2	0.01	3	1	0.23	16	0.0031
GOTERM_BP_DIRECT	regulation of cell proliferation	RT		9	271	185	16792	3.2	0.01	3	1	0.23	16	0.0032
GOTERM_BP_DIRECT	NIK/NF-kappaB signaling	RT		8	271	66	16792	2.8	8.9e-05	7.5	0.16	0.0069	0.15	1.1e-05
GOTERM_BP_DIRECT	negative regulation of ubiquitin-protein ligase activity involved in mitotic cell cycle	RT		8	271	71	16792	2.8	0.00014	7	0.24	0.0094	0.24	1.8e-05
GOTERM_BP_DIRECT	positive regulation of ubiquitin-protein ligase activity involved in regulation of mitotic cell cycle transition	RT		8	271	76	16792	2.8	0.00022	6.5	0.34	0.012	0.37	3e-05
GOTERM_BP_DIRECT	anaphase-promoting complex-dependent catabolic process	RT		8	271	79	16792	2.8	0.00028	6.3	0.41	0.015	0.47	4e-05
GOTERM_BP_DIRECT	response to ethanol	RT		8	271	105	16792	2.8	0.0015	4.7	0.95	0.059	2.6	0.0003
GOTERM_BP_DIRECT	positive regulation of canonical Wnt signaling pathway	RT		8	271	120	16792	2.8	0.0033	4.1	1	0.11	5.5	0.00073
GOTERM_BP_DIRECT	Fc-gamma receptor signaling pathway involved in phagocytosis	RT		8	271	127	16792	2.8	0.0045	3.9	1	0.13	7.4	0.0011
GOTERM_BP_DIRECT	protein stabilization	RT		8	271	136	16792	2.8	0.0065	3.6	1	0.17	11	0.0016
GOTERM_BP_DIRECT	adaptive immune response	RT		8	271	148	16792	2.8	0.01	3.3	1	0.22	16	0.0028
GOTERM_BP_DIRECT	cell migration	RT		8	271	172	16792	2.8	0.021	2.9	1	0.33	31	0.0069
GOTERM_BP_DIRECT	regulation of apoptotic process	RT		8	271	213	16792	2.8	0.057	2.3	1	0.59	64	0.023
GOTERM_BP_DIRECT	proteolysis involved in cellular protein catabolic process	RT		7	271	48	16792	2.5	0.00011	9	0.2	0.0084	0.19	1.1e-05
GOTERM_BP_DIRECT	substantia nigra development	RT		7	271	49	16792	2.5	0.00013	8.9	0.22	0.0088	0.22	1.3e-05
GOTERM_BP_DIRECT	regulation of cellular amino acid metabolic process	RT		7	271	51	16792	2.5	0.00016	8.5	0.27	0.0099	0.27	1.7e-05
GOTERM_BP_DIRECT	cellular response to organic cyclic compound	RT		7	271	59	16792	2.5	0.00036	7.4	0.5	0.018	0.62	4.4e-05
GOTERM_BP_DIRECT	cellular defense response	RT		7	271	62	16792	2.5	0.00047	7	0.6	0.022	0.81	6.1e-05
GOTERM_BP_DIRECT	vascular endothelial growth factor receptor signaling pathway	RT		7	271	72	16792	2.5	0.0011	6	0.87	0.045	1.8	0.00016
GOTERM_BP_DIRECT	cell-matrix adhesion	RT		7	271	90	16792	2.5	0.0033	4.8	1	0.11	5.5	0.00063
GOTERM_BP_DIRECT	transmembrane receptor protein tyrosine kinase signaling pathway	RT		7	271	96	16792	2.5	0.0045	4.5	1	0.13	7.5	0.00093
GOTERM_BP_DIRECT	Wnt signaling pathway	RT		7	271	187	16792	2.5	0.082	2.3	1	0.67	77	0.032
GOTERM_BP_DIRECT	extracellular matrix organization	RT		7	271	196	16792	2.5	0.097	2.2	1	0.71	83	0.04
GOTERM_BP_DIRECT	cellular response to interleukin-4	RT		6	271	24	16792	2.1	3.4e-05	15.5	0.064	0.0031	0.059	1.8e-06
GOTERM_BP_DIRECT	regulation of protein stability	RT		6	271	70	16792	2.1	0.0054	5.3	1	0.15	8.8	0.00092
GOTERM_BP_DIRECT	apoptotic signaling pathway	RT		6	271	71	16792	2.1	0.0057	5.2	1	0.16	9.3	0.001
GOTERM_BP_DIRECT	extracellular matrix disassembly	RT		6	271	76	16792	2.1	0.0076	4.9	1	0.19	12	0.0014
GOTERM_BP_DIRECT	regulation of phosphatidylinositol 3-kinase signaling	RT		6	271	78	16792	2.1	0.0084	4.8	1	0.2	13	0.0016
GOTERM_BP_DIRECT	transforming growth factor beta receptor signaling pathway	RT		6	271	92	16792	2.1	0.016	4	1	0.29	25	0.0037
GOTERM_BP_DIRECT	peptidyl-tyrosine dephosphorylation	RT		6	271	99	16792	2.1	0.022	3.8	1	0.33	31	0.0054
GOTERM_BP_DIRECT	platelet degranulation	RT		6	271	103	16792	2.1	0.025	3.6	1	0.37	36	0.0065
GOTERM_BP_DIRECT	response to virus	RT		6	271	110	16792	2.1	0.032	3.4	1	0.43	43	0.0089
GOTERM_BP_DIRECT	cellular response to tumor necrosis factor	RT		6	271	110	16792	2.1	0.032	3.4	1	0.43	43	0.0089
GOTERM_BP_DIRECT	protein complex assembly	RT		6	271	116	16792	2.1	0.039	3.2	1	0.48	50	0.011
GOTERM_BP_DIRECT	protein dephosphorylation	RT		6	271	126	16792	2.1	0.053	3	1	0.56	61	0.016
GOTERM_BP_DIRECT	autophagy	RT		6	271	133	16792	2.1	0.064	2.8	1	0.61	68	0.021
GOTERM_BP_DIRECT	regulation of small GTPase mediated signal transduction	RT		6	271	134	16792	2.1	0.065	2.8	1	0.61	69	0.022
GOTERM_BP_DIRECT	G2/M transition of mitotic cell cycle	RT		6	271	137	16792	2.1	0.07	2.7	1	0.63	71	0.024
GOTERM_BP_DIRECT	negative thymic T cell selection	RT		5	271	11	16792	1.8	2e-05	28.2	0.037	0.002	0.034	4.5e-07
GOTERM_BP_DIRECT	positive regulation of T cell differentiation	RT		5	271	15	16792	1.8	7.8e-05	20.7	0.14	0.0062	0.13	2.8e-06
GOTERM_BP_DIRECT	ribosomal small subunit assembly	RT		5	271	19	16792	1.8	0.00021	16.3	0.33	0.012	0.36	1e-05
GOTERM_BP_DIRECT	receptor clustering	RT		5	271	20	16792	1.8	0.00026	15.5	0.39	0.014	0.44	1.3e-05
GOTERM_BP_DIRECT	platelet aggregation	RT		5	271	41	16792	1.8	0.0041	7.6	1	0.13	6.9	0.00049
GOTERM_BP_DIRECT	regulation of macroautophagy	RT		5	271	44	16792	1.8	0.0054	7	1	0.15	8.8	0.00068
GOTERM_BP_DIRECT	response to cAMP	RT		5	271	46	16792	1.8	0.0063	6.7	1	0.17	10	0.00084
GOTERM_BP_DIRECT	T cell activation	RT		5	271	47	16792	1.8	0.0068	6.6	1	0.17	11	0.00093
GOTERM_BP_DIRECT	positive regulation of translation	RT		5	271	53	16792	1.8	0.01	5.8	1	0.22	16	0.0016
GOTERM_BP_DIRECT	B cell receptor signaling pathway	RT		5	271	54	16792	1.8	0.011	5.7	1	0.23	17	0.0017
GOTERM_BP_DIRECT	positive regulation of fibroblast proliferation	RT		5	271	54	16792	1.8	0.011	5.7	1	0.23	17	0.0017
GOTERM_BP_DIRECT	glutathione metabolic process	RT		5	271	56	16792	1.8	0.012	5.5	1	0.25	19	0.0021
GOTERM_BP_DIRECT	negative regulation of protein binding	RT		5	271	57	16792	1.8	0.013	5.4	1	0.25	20	0.0022
GOTERM_BP_DIRECT	humoral immune response	RT		5	271	57	16792	1.8	0.013	5.4	1	0.25	20	0.0022
GOTERM_BP_DIRECT	negative regulation of ERK1 and ERK2 cascade	RT		5	271	58	16792	1.8	0.014	5.3	1	0.26	22	0.0024
GOTERM_BP_DIRECT	positive regulation of T cell proliferation	RT		5	271	60	16792	1.8	0.016	5.2	1	0.28	24	0.0028
GOTERM_BP_DIRECT	DNA damage response, signal transduction by p53 class mediator resulting in cell cycle arrest	RT		5	271	62	16792	1.8	0.018	5	1	0.3	26	0.0032
GOTERM_BP_DIRECT	cell morphogenesis	RT		5	271	62	16792	1.8	0.018	5	1	0.3	26	0.0032
GOTERM_BP_DIRECT	positive regulation of phosphatidylinositol 3-kinase signaling	RT		5	271	65	16792	1.8	0.021	4.8	1	0.33	30	0.004
GOTERM_BP_DIRECT	cellular response to drug	RT		5	271	69	16792	1.8	0.025	4.5	1	0.37	35	0.0051
GOTERM_BP_DIRECT	Ras protein signal transduction	RT		5	271	70	16792	1.8	0.026	4.4	1	0.38	37	0.0054
GOTERM_BP_DIRECT	negative regulation of catalytic activity	RT		5	271	75	16792	1.8	0.033	4.1	1	0.43	43	0.0073
GOTERM_BP_DIRECT	viral entry into host cell	RT		5	271	80	16792	1.8	0.04	3.9	1	0.48	50	0.0095
GOTERM_BP_DIRECT	positive regulation of protein kinase B signaling	RT		5	271	84	16792	1.8	0.046	3.7	1	0.52	56	0.012
GOTERM_BP_DIRECT	response to estradiol	RT		5	271	91	16792	1.8	0.059	3.4	1	0.6	65	0.016
GOTERM_BP_DIRECT	negative regulation of protein kinase activity	RT		5	271	99	16792	1.8	0.076	3.1	1	0.65	74	0.022
GOTERM_BP_DIRECT	phosphatidylinositol-mediated signaling	RT		5	271	106	16792	1.8	0.092	2.9	1	0.7	81	0.029
GOTERM_BP_DIRECT	muscle contraction	RT		5	271	107	16792	1.8	0.094	2.9	1	0.7	82	0.03
GOTERM_BP_DIRECT	positive regulation of transcription factor import into nucleus	RT		4	271	15	16792	1.4	0.0016	16.5	0.96	0.061	2.7	7.9e-05
GOTERM_BP_DIRECT	translational elongation	RT		4	271	18	16792	1.4	0.0028	13.8	1	0.099	4.7	0.00017
GOTERM_BP_DIRECT	regulation of neuron apoptotic process	RT		4	271	19	16792	1.4	0.0033	13	1	0.11	5.5	0.00021
GOTERM_BP_DIRECT	positive regulation of calcium-mediated signaling	RT		4	271	20	16792	1.4	0.0038	12.4	1	0.12	6.4	0.00026
GOTERM_BP_DIRECT	leukocyte cell-cell adhesion	RT		4	271	25	16792	1.4	0.0073	9.9	1	0.18	12	0.00064
GOTERM_BP_DIRECT	nucleotide-binding oligomerization domain containing signaling pathway	RT		4	271	25	16792	1.4	0.0073	9.9	1	0.18	12	0.00064
GOTERM_BP_DIRECT	cytoplasmic translation	RT		4	271	25	16792	1.4	0.0073	9.9	1	0.18	12	0.00064
GOTERM_BP_DIRECT	phosphatidylinositol 3-kinase signaling	RT		4	271	27	16792	1.4	0.009	9.2	1	0.21	14	0.00087
GOTERM_BP_DIRECT	negative regulation of DNA binding	RT		4	271	28	16792	1.4	0.01	8.9	1	0.23	16	0.001
GOTERM_BP_DIRECT	regulation of defense response to virus by virus	RT		4	271	28	16792	1.4	0.01	8.9	1	0.23	16	0.001
GOTERM_BP_DIRECT	liver regeneration	RT		4	271	29	16792	1.4	0.011	8.5	1	0.22	17	0.0011
GOTERM_BP_DIRECT	establishment or maintenance of cell polarity	RT		4	271	29	16792	1.4	0.011	8.5	1	0.22	17	0.0011
GOTERM_BP_DIRECT	positive regulation of protein insertion into mitochondrial membrane involved in apoptotic signaling pathway	RT		4	271	30	16792	1.4	0.012	8.3	1	0.24	19	0.0013
GOTERM_BP_DIRECT	T cell differentiation	RT		4	271	30	16792	1.4	0.012	8.3	1	0.24	19	0.0013
GOTERM_BP_DIRECT	cellular response to fibroblast growth factor stimulus	RT		4	271	30	16792	1.4	0.012	8.3	1	0.24	19	0.0013
GOTERM_BP_DIRECT	regulation of tumor necrosis factor-mediated signaling pathway	RT		4	271	30	16792	1.4	0.012	8.3	1	0.24	19	0.0013
GOTERM_BP_DIRECT	B cell proliferation	RT		4	271	32	16792	1.4	0.014	7.7	1	0.27	22	0.0017
GOTERM_BP_DIRECT	cellular response to epidermal growth factor stimulus	RT		4	271	33	16792	1.4	0.016	7.5	1	0.28	24	0.0019
GOTERM_BP_DIRECT	regulation of protein kinase activity	RT		4	271	34	16792	1.4	0.017	7.3	1	0.29	25	0.0021
GOTERM_BP_DIRECT	negative regulation of MAP kinase activity	RT		4	271	36	16792	1.4	0.02	6.9	1	0.32	29	0.0026
GOTERM_BP_DIRECT	positive regulation of cell differentiation	RT		4	271	37	16792	1.4	0.021	6.7	1	0.33	31	0.0029
GOTERM_BP_DIRECT	negative regulation of cell cycle	RT		4	271	37	16792	1.4	0.021	6.7	1	0.33	31	0.0029
GOTERM_BP_DIRECT	peptidyl-tyrosine autophosphorylation	RT		4	271	40	16792	1.4	0.026	6.2	1	0.38	37	0.0038
GOTERM_BP_DIRECT	positive regulation of stress fiber assembly	RT		4	271	42	16792	1.4	0.03	5.9	1	0.41	40	0.0046
GOTERM_BP_DIRECT	cellular response to hormone stimulus	RT		4	271	45	16792	1.4	0.036	5.5	1	0.45	46	0.0059
GOTERM_BP_DIRECT	actin cytoskeleton reorganization	RT		4	271	47	16792	1.4	0.04	5.3	1	0.48	50	0.0069
GOTERM_BP_DIRECT	Rho protein signal transduction	RT		4	271	50	16792	1.4	0.046	5	1	0.52	56	0.0085
GOTERM_BP_DIRECT	cellular response to hydrogen peroxide	RT		4	271	57	16792	1.4	0.064	4.3	1	0.61	68	0.013
GOTERM_BP_DIRECT	protein import into nucleus	RT		4	271	58	16792	1.4	0.067	4.3	1	0.62	69	0.014
GOTERM_BP_DIRECT	hemopoiesis	RT		4	271	59	16792	1.4	0.069	4.2	1	0.63	71	0.015
GOTERM_BP_DIRECT	positive regulation of smooth muscle cell proliferation	RT		4	271	60	16792	1.4	0.072	4.1	1	0.64	72	0.016
GOTERM_BP_DIRECT	positive regulation of protein binding	RT		4	271	61	16792	1.4	0.075	4.1	1	0.65	74	0.017
GOTERM_BP_DIRECT	response to stress	RT		4	271	61	16792	1.4	0.075	4.1	1	0.65	74	0.017
GOTERM_BP_DIRECT	SMAD protein signal transduction	RT		4	271	62	16792	1.4	0.078	4	1	0.65	75	0.018
GOTERM_BP_DIRECT	regulation of inflammatory response	RT		4	271	63	16792	1.4	0.081	3.9	1	0.66	76	0.019
GOTERM_BP_DIRECT	response to wounding	RT		4	271	63	16792	1.4	0.081	3.9	1	0.66	76	0.019
GOTERM_BP_DIRECT	cellular response to oxidative stress	RT		4	271	64	16792	1.4	0.084	3.9	1	0.67	78	0.02
GOTERM_BP_DIRECT	negative regulation of cysteine-type endopeptidase activity involved in apoptotic process	RT		4	271	69	16792	1.4	0.1	3.6	1	0.72	83	0.025
GOTERM_BP_DIRECT	cellular response to phorbol 13-acetate 12-myristate	RT		3	271	7	16792	1.1	0.0051	26.6	1	0.15	8.4	0.00014
GOTERM_BP_DIRECT	positive regulation of actin filament depolymerization	RT		3	271	8	16792	1.1	0.0068	23.2	1	0.18	11	0.00022
GOTERM_BP_DIRECT	positive thymic T cell selection	RT		3	271	8	16792	1.1	0.0068	23.2	1	0.18	11	0.00022
GOTERM_BP_DIRECT	positive regulation of alpha-beta T cell proliferation	RT		3	271	9	16792	1.1	0.0086	20.7	1	0.2	14	0.00032
GOTERM_BP_DIRECT	positive regulation of podosome assembly	RT		3	271	10	16792	1.1	0.011	18.6	1	0.22	17	0.00046
GOTERM_BP_DIRECT	sequestering of actin monomers	RT		3	271	10	16792	1.1	0.011	18.6	1	0.22	17	0.00046
GOTERM_BP_DIRECT	regulation of release of sequestered calcium ion into cytosol	RT		3	271	11	16792	1.1	0.013	16.9	1	0.25	20	0.00062
GOTERM_BP_DIRECT	wound healing, spreading of cells	RT		3	271	12	16792	1.1	0.015	15.5	1	0.28	23	0.00082
GOTERM_BP_DIRECT	respiratory burst	RT		3	271	13	16792	1.1	0.018	14.3	1	0.3	27	0.0011
GOTERM_BP_DIRECT	positive regulation of phosphoprotein phosphatase activity	RT		3	271	13	16792	1.1	0.018	14.3	1	0.3	27	0.0011
GOTERM_BP_DIRECT	regulation of interferon-gamma-mediated signaling pathway	RT		3	271	13	16792	1.1	0.018	14.3	1	0.3	27	0.0011
GOTERM_BP_DIRECT	barbed-end actin filament capping	RT		3	271	14	16792	1.1	0.021	13.3	1	0.33	30	0.0013
GOTERM_BP_DIRECT	positive regulation of B cell differentiation	RT		3	271	14	16792	1.1	0.021	13.3	1	0.33	30	0.0013
GOTERM_BP_DIRECT	ribosomal small subunit biogenesis	RT		3	271	16	16792	1.1	0.027	11.6	1	0.38	37	0.002
GOTERM_BP_DIRECT	response to muscle stretch	RT		3	271	16	16792	1.1	0.027	11.6	1	0.38	37	0.002
GOTERM_BP_DIRECT	cell fate specification	RT		3	271	18	16792	1.1	0.033	10.3	1	0.43	44	0.0028
GOTERM_BP_DIRECT	regulation of cell size	RT		3	271	20	16792	1.1	0.04	9.3	1	0.48	51	0.0039
GOTERM_BP_DIRECT	positive regulation of interleukin-4 production	RT		3	271	20	16792	1.1	0.04	9.3	1	0.48	51	0.0039
GOTERM_BP_DIRECT	ribosomal large subunit assembly	RT		3	271	21	16792	1.1	0.044	8.9	1	0.51	54	0.0045
GOTERM_BP_DIRECT	heterotypic cell-cell adhesion	RT		3	271	22	16792	1.1	0.048	8.4	1	0.53	57	0.0051
GOTERM_BP_DIRECT	sprouting angiogenesis	RT		3	271	25	16792	1.1	0.061	7.4	1	0.6	66	0.0074
GOTERM_BP_DIRECT	regulation of sequence-specific DNA binding transcription factor activity	RT		3	271	25	16792	1.1	0.061	7.4	1	0.6	66	0.0074
GOTERM_BP_DIRECT	positive regulation of viral genome replication	RT		3	271	26	16792	1.1	0.065	7.1	1	0.61	68	0.0082
GOTERM_BP_DIRECT	protein targeting to plasma membrane	RT		3	271	26	16792	1.1	0.065	7.1	1	0.61	68	0.0082
GOTERM_BP_DIRECT	T cell differentiation in thymus	RT		3	271	27	16792	1.1	0.069	6.9	1	0.63	71	0.0091
GOTERM_BP_DIRECT	protein import into nucleus, translocation	RT		3	271	28	16792	1.1	0.074	6.6	1	0.65	73	0.01
GOTERM_BP_DIRECT	regulation of mitochondrial membrane potential	RT		3	271	28	16792	1.1	0.074	6.6	1	0.65	73	0.01
GOTERM_BP_DIRECT	regulation of transcription from RNA polymerase II promoter in response to hypoxia	RT		3	271	28	16792	1.1	0.074	6.6	1	0.65	73	0.01
GOTERM_BP_DIRECT	positive regulation of DNA binding	RT		3	271	28	16792	1.1	0.074	6.6	1	0.65	73	0.01
GOTERM_BP_DIRECT	TRIF-dependent toll-like receptor signaling pathway	RT		3	271	28	16792	1.1	0.074	6.6	1	0.65	73	0.01
GOTERM_BP_DIRECT	B cell activation	RT		3	271	29	16792	1.1	0.079	6.4	1	0.66	75	0.011
GOTERM_BP_DIRECT	mitotic spindle organization	RT		3	271	30	16792	1.1	0.083	6.2	1	0.67	78	0.012
GOTERM_BP_DIRECT	actin filament bundle assembly	RT		3	271	30	16792	1.1	0.083	6.2	1	0.67	78	0.012
GOTERM_BP_DIRECT	positive regulation of establishment of protein localization to plasma membrane	RT		3	271	30	16792	1.1	0.083	6.2	1	0.67	78	0.012
GOTERM_BP_DIRECT	negative regulation of fibroblast proliferation	RT		3	271	31	16792	1.1	0.088	6	1	0.69	79	0.013
GOTERM_BP_DIRECT	positive regulation of phosphatidylinositol 3-kinase activity	RT		3	271	31	16792	1.1	0.088	6	1	0.69	79	0.013
GOTERM_BP_DIRECT	global genome nucleotide-excision repair	RT		3	271	32	16792	1.1	0.093	5.8	1	0.7	81	0.015
GOTERM_BP_DIRECT	lipopolysaccharide-mediated signaling pathway	RT		3	271	32	16792	1.1	0.093	5.8	1	0.7	81	0.015
GOTERM_BP_DIRECT	negative regulation of protein catabolic process	RT		3	271	32	16792	1.1	0.093	5.8	1	0.7	81	0.015
GOTERM_BP_DIRECT	cell projection organization	RT		3	271	33	16792	1.1	0.098	5.6	1	0.71	83	0.016
GOTERM_BP_DIRECT	interleukin-7-mediated signaling pathway	RT		2	271	2	16792	0.7	0.032	62	1	0.43	43	0.00026
GOTERM_BP_DIRECT	cellular response to cycloheximide	RT		2	271	3	16792	0.7	0.047	41.3	1	0.53	57	0.00077
GOTERM_BP_DIRECT	positive regulation of intrinsic apoptotic signaling pathway by p53 class mediator	RT		2	271	3	16792	0.7	0.047	41.3	1	0.53	57	0.00077
GOTERM_BP_DIRECT	membrane fission	RT		2	271	3	16792	0.7	0.047	41.3	1	0.53	57	0.00077
GOTERM_BP_DIRECT	actin filament fragmentation	RT		2	271	3	16792	0.7	0.047	41.3	1	0.53	57	0.00077
GOTERM_BP_DIRECT	formation of radial glial scaffolds	RT		2	271	3	16792	0.7	0.047	41.3	1	0.53	57	0.00077
GOTERM_BP_DIRECT	negative regulation of mitotic cell cycle phase transition	RT		2	271	4	16792	0.7	0.063	31	1	0.61	67	0.0015
GOTERM_BP_DIRECT	stress-activated protein kinase signaling cascade	RT		2	271	4	16792	0.7	0.063	31	1	0.61	67	0.0015
GOTERM_BP_DIRECT	neutrophil activation involved in immune response	RT		2	271	4	16792	0.7	0.063	31	1	0.61	67	0.0015
GOTERM_BP_DIRECT	negative regulation of B cell receptor signaling pathway	RT		2	271	4	16792	0.7	0.063	31	1	0.61	67	0.0015
GOTERM_BP_DIRECT	regulation of lymphocyte migration	RT		2	271	4	16792	0.7	0.063	31	1	0.61	67	0.0015
GOTERM_BP_DIRECT	cellular response to angiotensin	RT		2	271	5	16792	0.7	0.078	24.8	1	0.66	75	0.0025
GOTERM_BP_DIRECT	negative regulation of striated muscle tissue development	RT		2	271	5	16792	0.7	0.078	24.8	1	0.66	75	0.0025
GOTERM_BP_DIRECT	positive regulation of endoplasmic reticulum unfolded protein response	RT		2	271	5	16792	0.7	0.078	24.8	1	0.66	75	0.0025
GOTERM_BP_DIRECT	positive regulation of hepatocyte proliferation	RT		2	271	6	16792	0.7	0.093	20.7	1	0.7	81	0.0037
GOTERM_BP_DIRECT	response to thyroid hormone	RT		2	271	6	16792	0.7	0.093	20.7	1	0.7	81	0.0037
GOTERM_BP_DIRECT	negative regulation of stress-activated MAPK cascade	RT		2	271	6	16792	0.7	0.093	20.7	1	0.7	81	0.0037
GOTERM_BP_DIRECT	alpha-beta T cell differentiation	RT		2	271	6	16792	0.7	0.093	20.7	1	0.7	81	0.0037
GOTERM_BP_DIRECT	positive regulation of reactive oxygen species biosynthetic process	RT		2	271	6	16792	0.7	0.093	20.7	1	0.7	81	0.0037
GOTERM_BP_DIRECT	regulation of B cell differentiation	RT		2	271	6	16792	0.7	0.093	20.7	1	0.7	81	0.0037
	53 gene(s) from your list are not in the output
