# Supplementary material for: Costimulation of γδTCR and TLR7/8 promotes Vδ2 T-cell antitumor activity by modulating mTOR pathway and APC function
Source: HighWire-hosted journal article supplement (doi:10.1136/jitc-2021-003339), 2021-12-01
Supplement: jitc-2021-003339supp017_data_supplement.pdf [file jitc-2021-003339supp017_data_supplement.pdf]

## Graphical Abstracts

### Costimulation of $\gamma\delta$ TCR and TLR7/8 promotes V $\delta$ 2 T cell antitumor activity by modulating mTOR pathway and APC

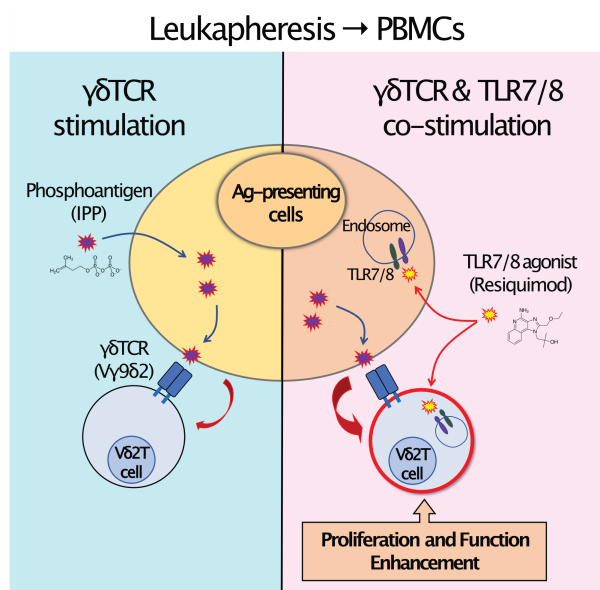

#### Authors

Huaishan Wang, Hui Chen, Shujing Liu, Jie Zhang, Hezhe Lu, Rajasekharan Somasundaram, Robin Choi, Gao Zhang, Lingling Ou, John Scholler, Shifu Tian, Liyun Dong, Yeye Guo, Lili Huang, Thomas Connelly, Ling Li, Alexander C. Huang, Tara Mitchell, Yi Fan, Carl June, Gordon Mills, Wei Guo, Meenhard Herlyn, Xiaowei Xu

#### Correspondence

xug@pennmedicine.upenn.edu.

#### In Brief

Zoledronate-based V $\delta$ 2 T cell expansion methods may produce  $\gamma\delta$ T cells with exhausted immunophenotypes. Wang et al. demonstrates that co-stimulation of  $\gamma\delta$ TCR and TLR7/8 using IPP and resiquimod promotes proliferation and anti-tumor function of V $\delta$ 2 T cells, which has the potential to increase treatment efficacy of  $\gamma\delta$ T cell-based therapies.
