# Supplementary figures and images for: Costimulation of γδTCR and TLR7/8 promotes Vδ2 T-cell antitumor activity by modulating mTOR pathway and APC function
Source: HighWire-hosted journal article supplement (doi:10.1136/jitc-2021-003339), 2021-12-01

# Figure S10

**A**

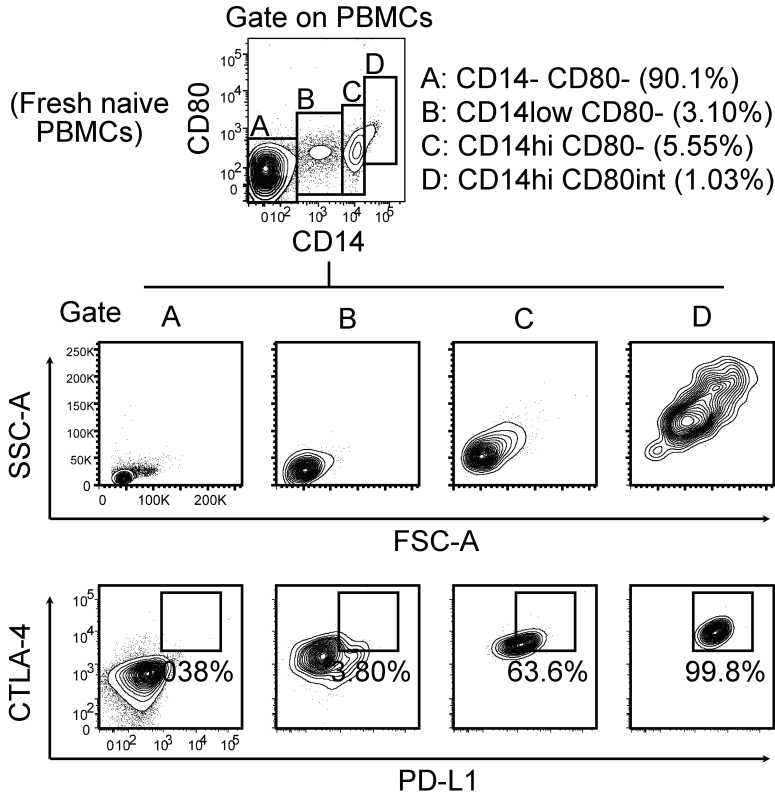

**B**

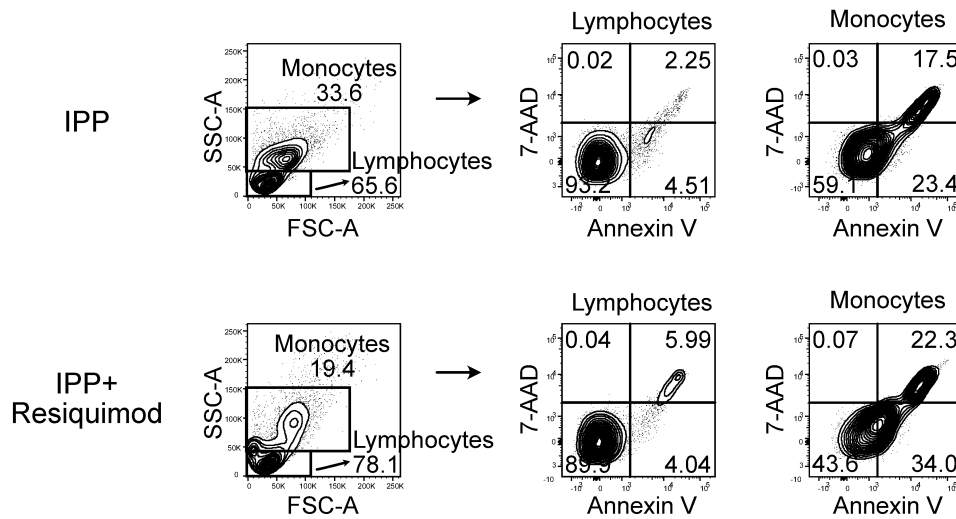

**C**

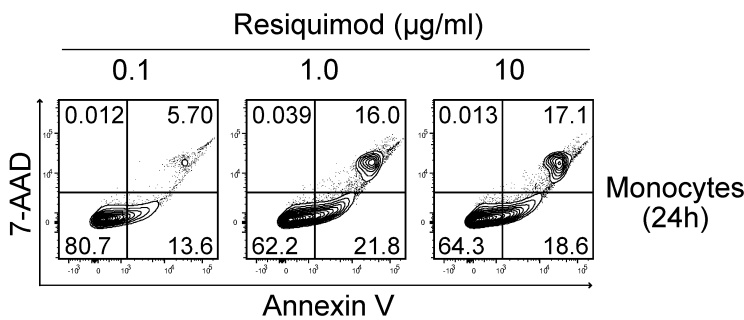

Supplement: jitc-2021-003339supp012_data_supplement.pdf [file jitc-2021-003339supp012_data_supplement.pdf]

## Figure S11

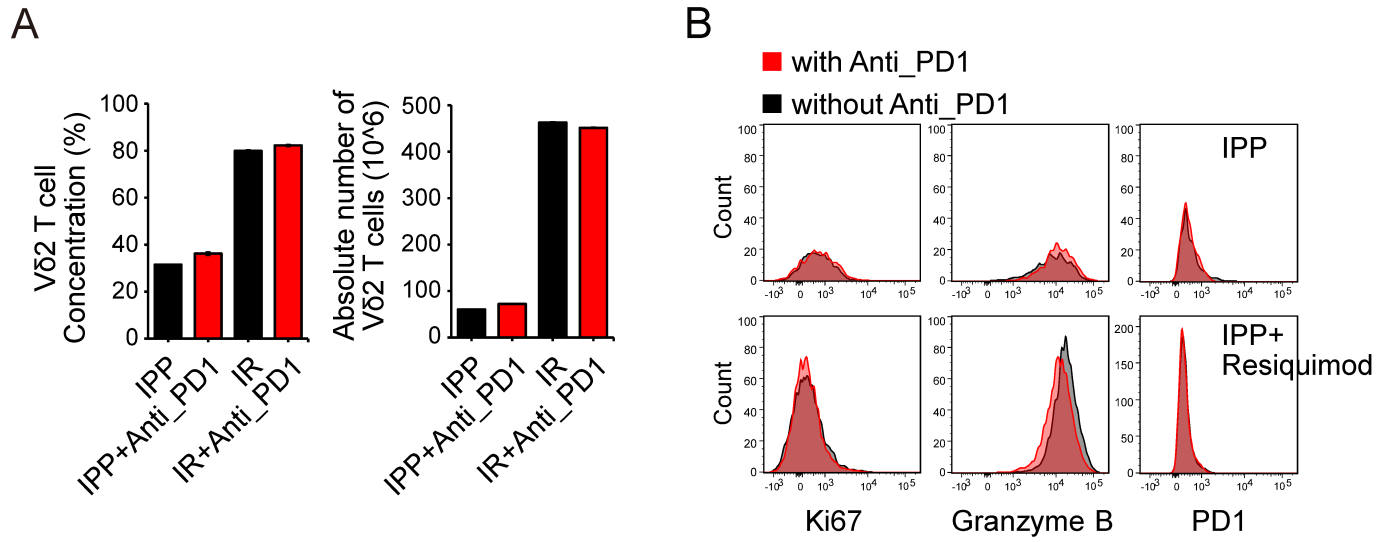

Supplement: jitc-2021-003339supp013_data_supplement.pdf [file jitc-2021-003339supp013_data_supplement.pdf]

# Figure S1

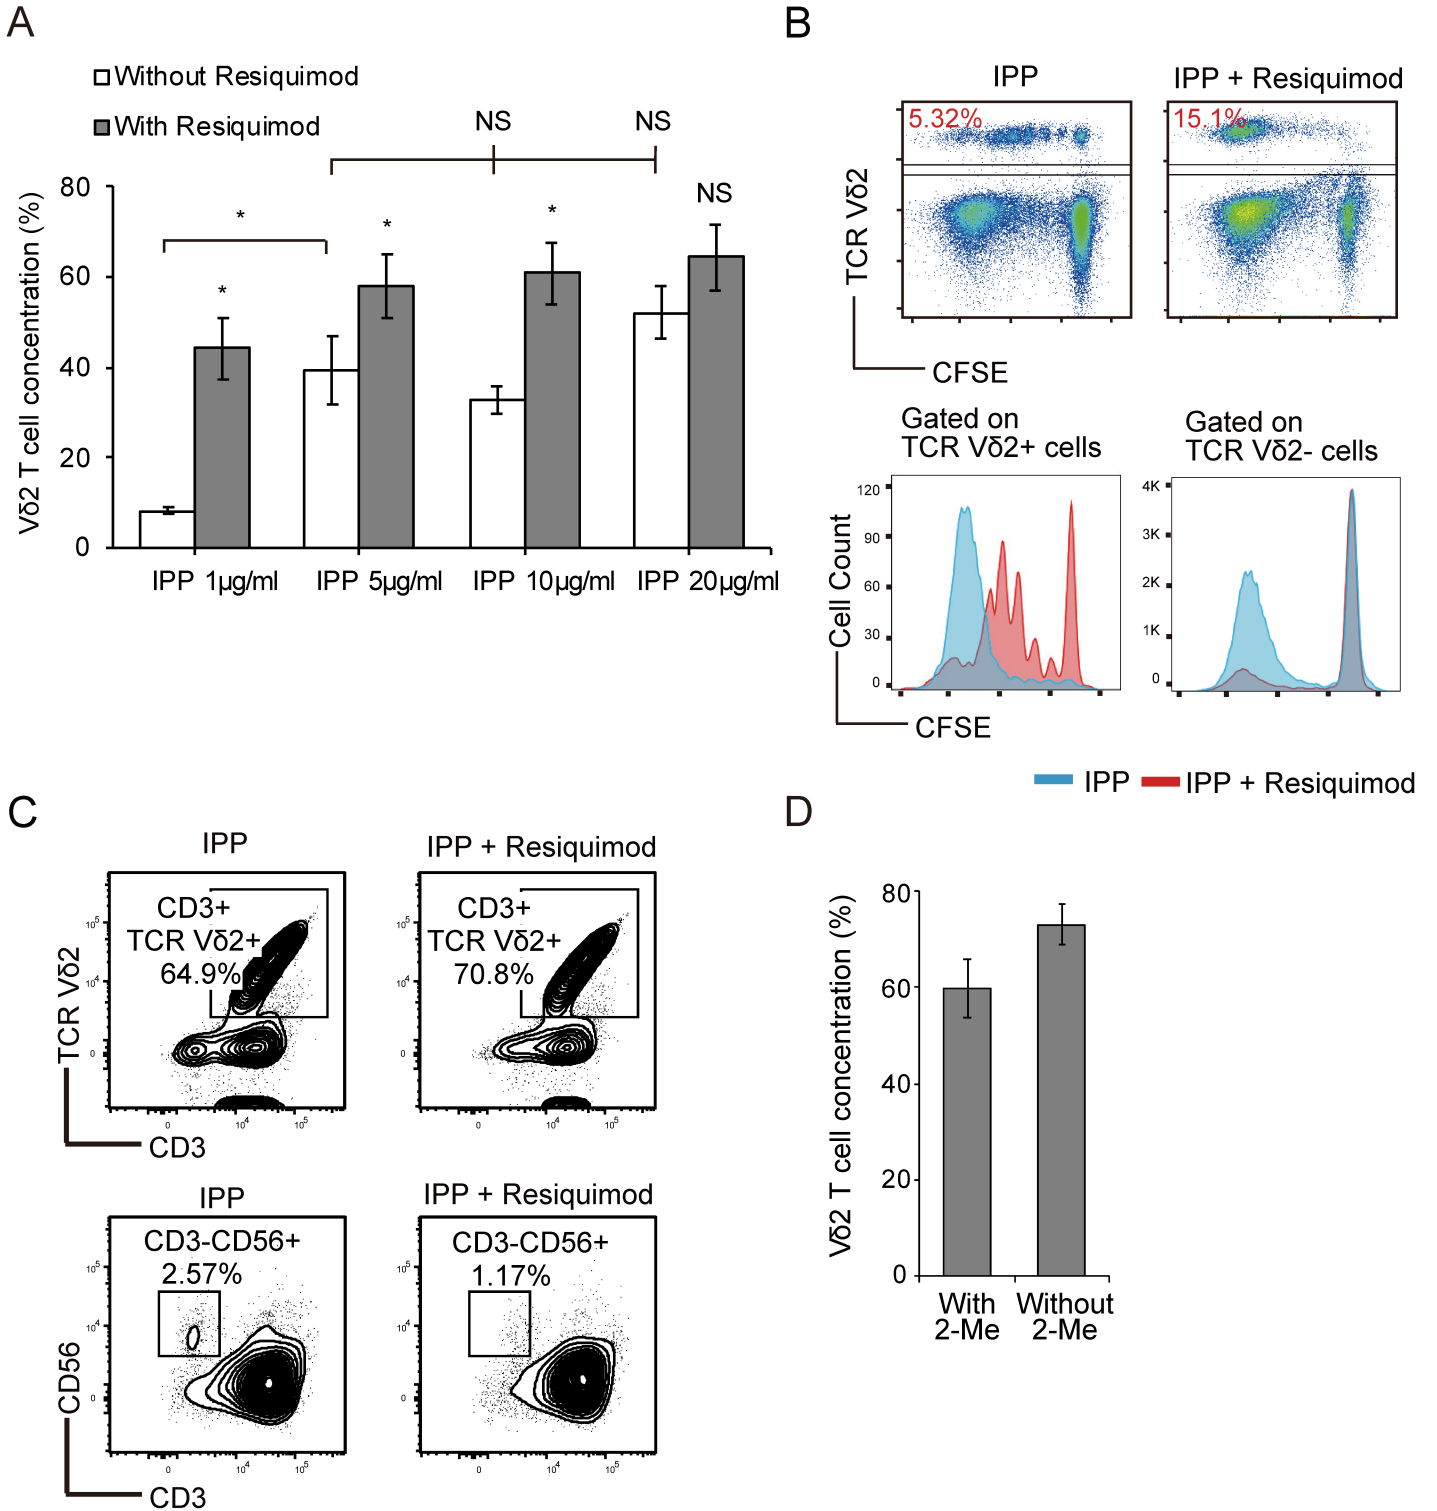

Supplement: jitc-2021-003339supp003_data_supplement.pdf [file jitc-2021-003339supp003_data_supplement.pdf]

## Figure S2

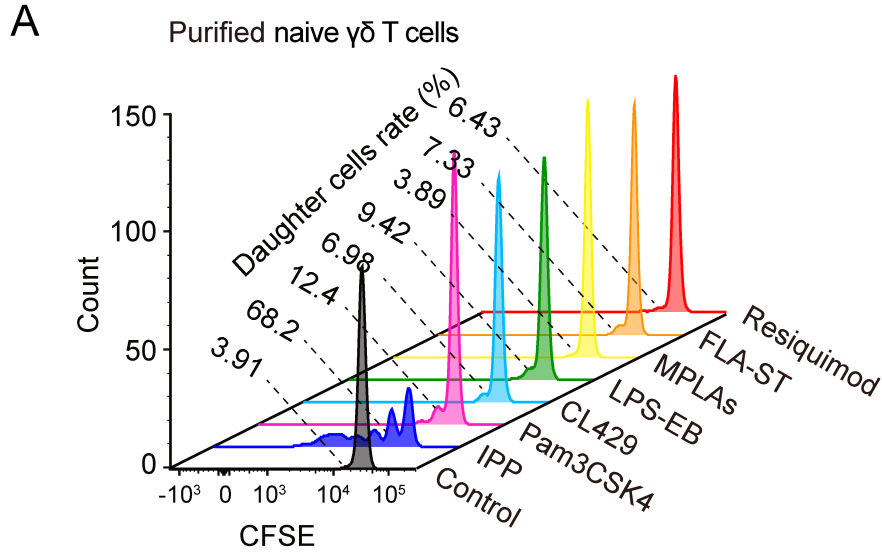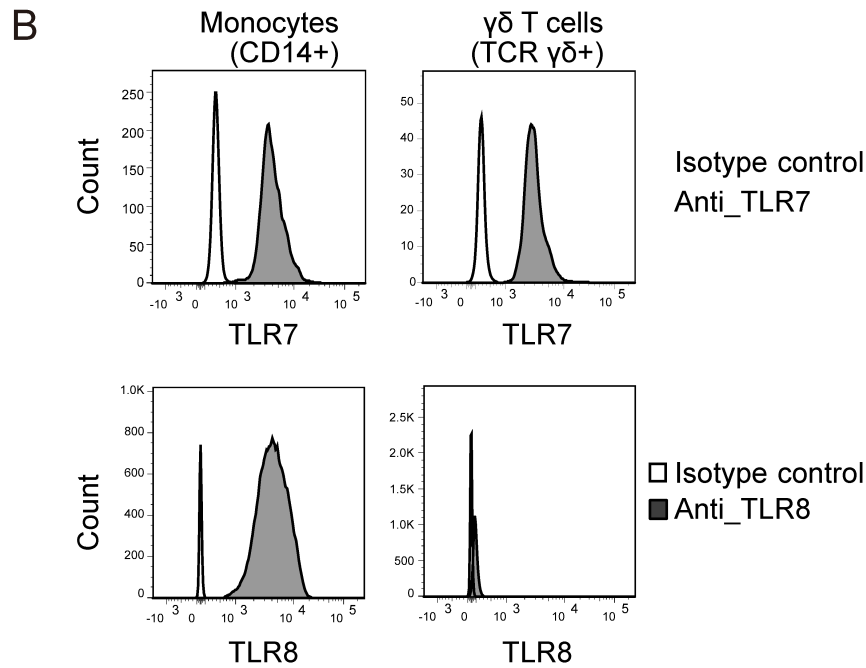

Supplement: jitc-2021-003339supp004_data_supplement.pdf [file jitc-2021-003339supp004_data_supplement.pdf]

Figure S4

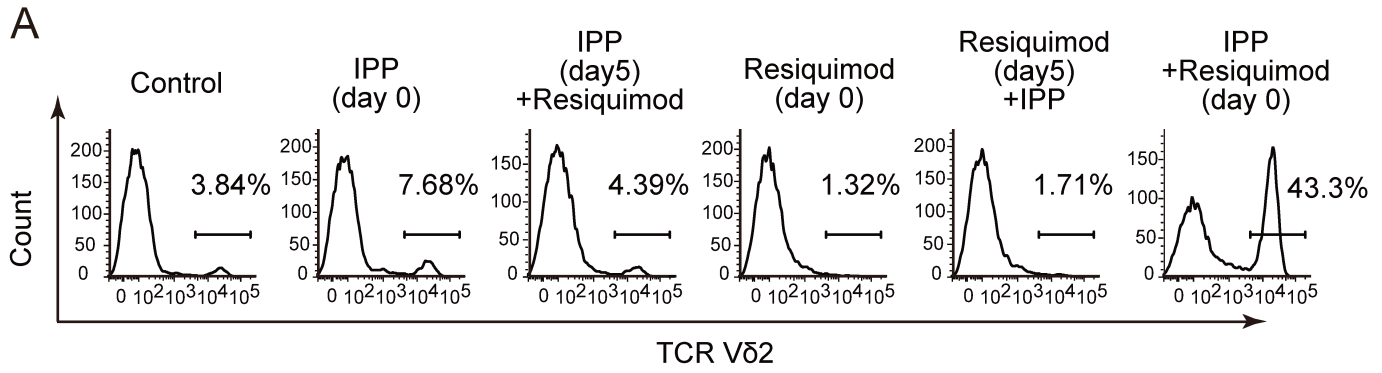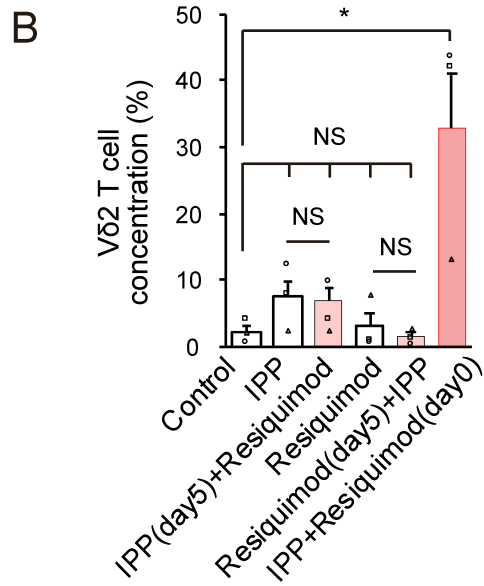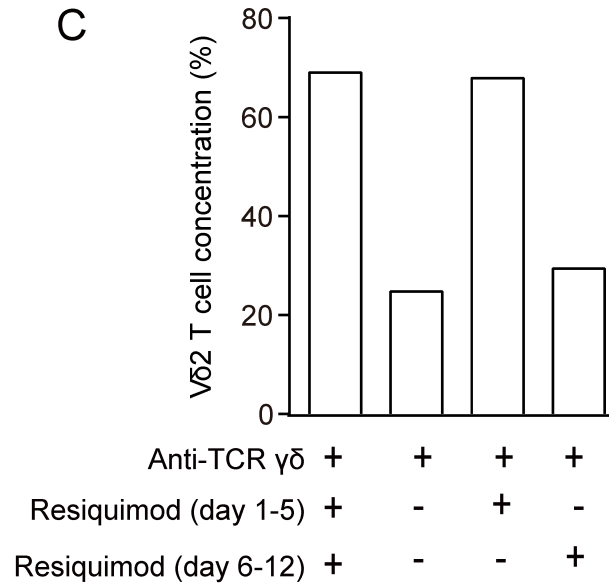

Supplement: jitc-2021-003339supp006_data_supplement.pdf [file jitc-2021-003339supp006_data_supplement.pdf]
